# Supplementary material
Source: PubMed Central journal article supplement (PMC9851245)
Supplement: KAUP_A_2059744_SM3379.pdf [file KAUP_A_2059744_SM3379.pdf]

**Table S1.** Predicted canonical uORFs of *ATG* genes in yeast.

| CDS     | Gene         | Initiator site | Length | uORF end to CDS | Ribosomes bound | Type        | Tested in this study |
|---------|--------------|----------------|--------|-----------------|-----------------|-------------|----------------------|
| YPR185W | <i>ATG13</i> | aatagcATGagt   | 141    | -133            | 0               | CDS partial | Yes                  |
| YPL149W | <i>ATG5</i>  | taaataATGaag   | 9      | 76              | 0               | UTR only    | No                   |
| YPL149W | <i>ATG5</i>  | agtagcATGctc   | 42     | 33              | 3               | UTR only    | Yes                  |
| YPL149W | <i>ATG5</i>  | gtgcgaATGaata  | 51     | 8               | 5               | UTR only    | Yes                  |
| YPL149W | <i>ATG5</i>  | aaacctATGatg   | 9      | 3               | 2               | UTR only    | Yes                  |
| YPL149W | <i>ATG5</i>  | cctatgATGtaa   | 6      | 3               | 1               | UTR only    | Yes                  |
| YBR217W | <i>ATG12</i> | gaaccaATGaca   | 12     | -3              | 0               | CDS partial | Yes                  |
| YOL082W | <i>ATG19</i> | tagtatATGttt   | 12     | 134             | 0               | UTR only    | No                   |
| YOL082W | <i>ATG19</i> | atctccATGata   | 9      | 92              | 0               | UTR only    | No                   |
| YOL082W | <i>ATG19</i> | catgatATGagt   | 48     | 48              | 0               | UTR only    | Yes                  |

**Table S2.** Predicted uORFs (canonical and non-canonical) of *ATG* genes in human.

| uORF_ID                       | uORF_score  | Start_codon | Chromosome | Strand | Start_coordinate | End_coordinate | Gene             | Additional_transcripts                                                                 | Type       | Peptide_score |
|-------------------------------|-------------|-------------|------------|--------|------------------|----------------|------------------|----------------------------------------------------------------------------------------|------------|---------------|
| ENST00000288828.4.uORF_ATG.1  | 26.39566736 | ATG         | chr7       | +      | 5229910          | 5229984        | <i>WIP12</i>     | ENST00000404704.3.uORF_ATG.1,ENST00000382384.2.uORF_ATG.1,ENST00000401525.3.uORF_ATG.1 | UTR only   | 0.00031291    |
| ENST00000321867.4.uORF_GTG.1  | 26.11407861 | GTG         | chr12      | +      | 132379311        | 132379490      | <i>ULK1</i>      | -                                                                                      | UTR only   | 0.00087758    |
| ENST00000321867.4.uORF_ATC.1  | 25.57937761 | ATC         | chr12      | +      | 132379281        | 132379490      | <i>ULK1</i>      | -                                                                                      | UTR only   | 0.00031291    |
| ENST00000321867.4.uORF_TTG.4  | 25.57261685 | TTG         | chr12      | +      | 132379503        | 132379610      | <i>ULK1</i>      | -                                                                                      | CDSpartial | 0.8038648     |
| ENST00000321867.4.uORF_CTG.1  | 25.53682078 | CTG         | chr12      | +      | 132379357        | 132380180      | <i>ULK1</i>      | -                                                                                      | CDSpartial | 0.00087758    |
| ENST00000359933.4.uORF_ATG.4  | 25.51729724 | ATG         | chr14      | -      | 96829466         | 96829452       | <i>ATG2B</i>     | -                                                                                      | UTRonly    | 0.00198221    |
| ENST00000321867.4.uORF_ATG.1  | 25.45758162 | ATG         | chr12      | +      | 132379395        | 132379490      | <i>ULK1</i>      | -                                                                                      | UTR only   | 0.9026072     |
| ENST00000037243.2.uORF_CTG.3  | 25.3849053  | CTG         | chr16      | +      | 75600297         | 75600338       | <i>GABARAPL2</i> | ENST00000565057.1.uORF_CTG.2,ENST00000563744.1.uORF_CTG.2                              | UTR only   | 0.00198221    |
| ENST00000321867.4.uORF_TTG.2  | 25.1779686  | TTG         | chr12      | +      | 132379230        | 132379490      | <i>ULK1</i>      | -                                                                                      | UTR only   | 0.00031291    |
| ENST00000359933.4.uORF_ATG.2  | 25.08050635 | ATG         | chr14      | -      | 96830013         | 96829405       | <i>ATG2B</i>     | -                                                                                      | UTR only   | 0.00087758    |
| ENST00000359933.4.uORF_ATG.3  | 25.04909199 | ATG         | chr14      | -      | 96829655         | 96829452       | <i>ATG2B</i>     | -                                                                                      | UTR only   | 0.00087758    |
| ENST00000321867.4.uORF_TTG.3  | 24.99563968 | TTG         | chr12      | +      | 132379253        | 132379297      | <i>ULK1</i>      | -                                                                                      | UTR only   | 0.00198221    |
| ENST00000321867.4.uORF_ATT.2  | 24.97137523 | ATT         | chr12      | +      | 132379293        | 132379490      | <i>ULK1</i>      | -                                                                                      | UTR only   | 0.00087758    |
| ENST00000321867.4.uORF_ATG.2  | 24.86704554 | ATG         | chr12      | +      | 132379416        | 132379490      | <i>ULK1</i>      | -                                                                                      | UTR only   | 0.8038648     |
| ENST00000321867.4.uORF_ATT.1  | 24.77298914 | ATT         | chr12      | +      | 132379287        | 132379490      | <i>ULK1</i>      | -                                                                                      | UTR only   | 0.00031291    |
| ENST00000359933.4.uORF_AC G.1 | 24.68345834 | ACG         | chr14      | -      | 96830160         | 96829405       | <i>ATG2B</i>     | -                                                                                      | UTR only   | 0.00087758    |
| ENST00000396761.2.uORF_ATT.1  | 24.64434127 | ATT         | chr2       | -      | 220094417        | 220094337      | <i>ATG9A</i>     | -                                                                                      | UTR only   | 0.00010328    |
| ENST00000321867.4.uORF_TTG.1  | 24.64222352 | TTG         | chr12      | +      | 132379219        | 132380180      | <i>ULK1</i>      | -                                                                                      | CDSpartial | 0.00028977    |
| ENST00000359933.4.uORF_CT G.9 | 24.50051499 | CTG         | chr14      | -      | 96829795         | 96829652       | <i>ATG2B</i>     | -                                                                                      | UTR only   | 0.00087758    |

|                                |             |     |       |   |           |           |                   |                                                                                           |            |            |
|--------------------------------|-------------|-----|-------|---|-----------|-----------|-------------------|-------------------------------------------------------------------------------------------|------------|------------|
| ENST0000037243.2.uORF_GT G.3   | 24.43442655 | GTG | chr16 | + | 75600330  | 75600338  | <i>GABARAP L2</i> | ENST00000565057.1.uORF_GTG.3,ENST00000563744.1.uORF_GTG.2                                 | UTR only   | 1.06E-05   |
| ENST00000359933.4.uORF_AT G.5  | 24.39813749 | ATG | chr14 | - | 96829428  | 96829405  | <i>ATG2B</i>      | -                                                                                         | UTR only   | 0.00198221 |
| ENST00000396761.2.uORF_TTG .1  | 24.38327965 | TTG | chr2  | - | 220094416 | 220094363 | <i>ATG9A</i>      | -                                                                                         | UTR only   | 0.00070728 |
| ENST00000359933.4.uORF_GT G.6  | 24.33620621 | GTG | chr14 | - | 96829751  | 96829698  | <i>ATG2B</i>      | -                                                                                         | UTR only   | 0.00028977 |
| ENST00000288828.4.uORF_AT C.1  | 24.22868091 | ATC | chr7  | + | 5229925   | 5229984   | <i>WIP12</i>      | ENST00000404704.3.uORF_ATC.1,ENST00000382384.2.uORF_ATC.1,ENST00000401525.3.uORF_ATC.1    | UTR only   | 0.325226   |
| ENST00000268607.5.uORF_AT G.4  | 24.19759218 | ATG | chr16 | + | 87425838  | 87425879  | <i>MAP1LC3 B</i>  | -                                                                                         | UTR only   | 0.9026072  |
| ENST00000359933.4.uORF_CT G.11 | 24.1535456  | CTG | chr14 | - | 96829710  | 96829405  | <i>ATG2B</i>      | -                                                                                         | UTR only   | 0.00087758 |
| ENST00000321867.4.uORF_CT G.5  | 24.14771579 | CTG | chr12 | + | 132379540 | 132380180 | <i>ULK1</i>       | -                                                                                         | CDSpartial | 0.00087758 |
| ENST00000288828.4.uORF_AC G.1  | 24.11097963 | ACG | chr7  | + | 5229905   | 5229913   | <i>WIP12</i>      | ENST00000382384.2.uORF_AC G.1,ENST00000404704.3.uORF_AC G.1,ENST00000401525.3.uORF_AC G.1 | UTR only   | 1.06E-05   |
| ENST00000396761.2.uORF_TTG .3  | 23.91131874 | TTG | chr2  | - | 220094385 | 220092746 | <i>ATG9A</i>      | -                                                                                         | CDSpartial | 0.00087758 |
| ENST00000288828.4.uORF_GT G.2  | 23.89169126 | GTG | chr7  | + | 5229871   | 5229984   | <i>WIP12</i>      | ENST00000401525.3.uORF_GTG.2                                                              | UTR only   | 0.00012783 |
| ENST00000359933.4.uORF_CT G.16 | 23.88930507 | CTG | chr14 | - | 96829514  | 96829452  | <i>ATG2B</i>      | -                                                                                         | UTR only   | 0.9026072  |
| ENST00000359933.4.uORF_AC G.2  | 23.86795292 | ACG | chr14 | - | 96830064  | 96829405  | <i>ATG2B</i>      | -                                                                                         | UTR only   | 0.00087758 |
| ENST00000268607.5.uORF_AT G.3  | 23.84102887 | ATG | chr16 | + | 87425745  | 87425879  | <i>MAP1LC3 B</i>  | -                                                                                         | UTR only   | 0.8038648  |
| ENST00000359933.4.uORF_TTG .2  | 23.83503217 | TTG | chr14 | - | 96829562  | 96829452  | <i>ATG2B</i>      | -                                                                                         | UTR only   | 0.00198221 |
| ENST00000359933.4.uORF_CT G.4  | 23.82809083 | CTG | chr14 | - | 96830017  | 96829652  | <i>ATG2B</i>      | -                                                                                         | UTR only   | 0.00087758 |
| ENST00000359933.4.uORF_TTG .1  | 23.73905193 | TTG | chr14 | - | 96829582  | 96829223  | <i>ATG2B</i>      | -                                                                                         | CDSpartial | 0.00087758 |
| ENST00000359933.4.uORF_CT G.15 | 23.72360951 | CTG | chr14 | - | 96829534  | 96829223  | <i>ATG2B</i>      | -                                                                                         | CDSpartial | 0.00087758 |
| ENST00000359933.4.uORF_TTG .3  | 23.72097856 | TTG | chr14 | - | 96829507  | 96829223  | <i>ATG2B</i>      | -                                                                                         | CDSpartial | 0.00087758 |
| ENST00000359933.4.uORF_ATT .1  | 23.63737148 | ATT | chr14 | - | 96829645  | 96829223  | <i>ATG2B</i>      | -                                                                                         | CDSpartial | 0.00028977 |
| ENST00000359933.4.uORF_GT G.5  | 23.6308338  | GTG | chr14 | - | 96829753  | 96829652  | <i>ATG2B</i>      | -                                                                                         | UTR only   | 0.00028977 |

|                                |             |     |       |   |           |           |           |                                                                                        |            |            |
|--------------------------------|-------------|-----|-------|---|-----------|-----------|-----------|----------------------------------------------------------------------------------------|------------|------------|
| ENST00000359933.4.uORF_CT G.2  | 23.61499035 | CTG | chr14 | - | 96830049  | 96829405  | ATG2B     | -                                                                                      | UTR only   | 0.00087758 |
| ENST00000396761.2.uORF_GT G.3  | 23.40238303 | GTG | chr2  | - | 220094366 | 220094337 | ATG9A     | ENST00000361242.4.uORF_GTG.2                                                           | UTR only   | 0.00028977 |
| ENST00000359933.4.uORF_AC G.5  | 23.40151961 | ACG | chr14 | - | 96829668  | 96829405  | ATG2B     | -                                                                                      | UTR only   | 0.00087758 |
| ENST00000359933.4.uORF_GT G.8  | 23.40100879 | GTG | chr14 | - | 96829627  | 96829223  | ATG2B     | -                                                                                      | CDSpartial | 0.00028977 |
| ENST00000359933.4.uORF_GT G.2  | 23.3581883  | GTG | chr14 | - | 96830145  | 96829405  | ATG2B     | -                                                                                      | UTR only   | 0.00087758 |
| ENST00000396761.2.uORF_CT G.2  | 23.34372948 | CTG | chr2  | - | 220094376 | 220092746 | ATG9A     | -                                                                                      | CDSpartial | 0.00087758 |
| ENST00000359933.4.uORF_GT G.9  | 23.3086873  | GTG | chr14 | - | 96829621  | 96829223  | ATG2B     | -                                                                                      | CDSpartial | 0.00028977 |
| ENST00000524625.1.uORF_AT C.1  | 23.28881428 | ATC | chr11 | + | 46639311  | 46651638  | ATG13     | ENST00000578626.1.uORF_ATC.1.ENST00000312040.4.uORF_ATC.5.ENST00000577256.1.uORF_ATC.1 | UTR only   | 0.00031291 |
| ENST00000359933.4.uORF_AC G.4  | 23.28662789 | ACG | chr14 | - | 96829697  | 96829452  | ATG2B     | -                                                                                      | UTR only   | 0.00087758 |
| ENST00000268607.5.uORF_CT G.6  | 23.27577349 | CTG | chr16 | + | 87425584  | 87425898  | MAP1LC3 B | -                                                                                      | UTR only   | 0.00087758 |
| ENST00000359933.4.uORF_AT G.1  | 23.27311603 | ATG | chr14 | - | 96830194  | 96830117  | ATG2B     | -                                                                                      | UTR only   | 0.00035863 |
| ENST00000268607.5.uORF_GT G.3  | 23.24953404 | GTG | chr16 | + | 87425586  | 87425879  | MAP1LC3 B | -                                                                                      | UTR only   | 0.00087758 |
| ENST00000359933.4.uORF_CT G.14 | 23.21163101 | CTG | chr14 | - | 96829539  | 96829405  | ATG2B     | -                                                                                      | UTR only   | 0.00087758 |
| ENST00000396761.2.uORF_GT G.1  | 23.1770432  | GTG | chr2  | - | 220094407 | 220094363 | ATG9A     | -                                                                                      | UTR only   | 0.00010328 |
| ENST00000268607.5.uORF_AT G.2  | 23.17482902 | ATG | chr16 | + | 87425535  | 87425879  | MAP1LC3 B | -                                                                                      | UTR only   | 0.00087758 |
| ENST00000359933.4.uORF_AC G.3  | 23.11861109 | ACG | chr14 | - | 96829983  | 96829405  | ATG2B     | -                                                                                      | UTR only   | 0.00028977 |
| ENST00000268607.5.uORF_CT G.8  | 23.10903706 | CTG | chr16 | + | 87425716  | 87425898  | MAP1LC3 B | -                                                                                      | UTR only   | 0.00087758 |
| ENST00000268607.5.uORF_AT C.1  | 23.096013   | ATC | chr16 | + | 87425616  | 87425879  | MAP1LC3 B | -                                                                                      | UTR only   | 0.00087758 |
| ENST00000268607.5.uORF_CT G.14 | 23.0848418  | CTG | chr16 | + | 87425860  | 87425898  | MAP1LC3 B | -                                                                                      | UTR only   | 0.00198221 |
| ENST00000396761.2.uORF_GT G.2  | 23.04632711 | GTG | chr2  | - | 220094392 | 220094363 | ATG9A     | ENST00000361242.4.uORF_GTG.1                                                           | UTR only   | 0.00010328 |
| ENST00000268607.5.uORF_CT G.13 | 23.03191105 | CTG | chr16 | + | 87425817  | 87425879  | MAP1LC3 B | -                                                                                      | UTR only   | 0.9026072  |

|                                |             |     |       |   |          |          |           |                                                                                                                     |            |            |
|--------------------------------|-------------|-----|-------|---|----------|----------|-----------|---------------------------------------------------------------------------------------------------------------------|------------|------------|
| ENST00000359933.4.uORF_CT G.10 | 23.02009661 | CTG | chr14 | - | 96829775 | 96829698 | ATG2B     | -                                                                                                                   | UTR only   | 0.00087758 |
| ENST00000268607.5.uORF_AC G.3  | 23.01467411 | ACG | chr16 | + | 87425733 | 87425879 | MAP1LC3 B | -                                                                                                                   | UTR only   | 0.8038648  |
| ENST00000359933.4.uORF_CT G.5  | 22.96792262 | CTG | chr14 | - | 96829986 | 96829405 | ATG2B     | -                                                                                                                   | UTR only   | 0.00087758 |
| ENST00000268607.5.uORF_GT G.5  | 22.93611428 | GTG | chr16 | + | 87425713 | 87425898 | MAP1LC3 B | -                                                                                                                   | UTR only   | 0.00028977 |
| ENST00000268607.5.uORF_CT G.10 | 22.88986361 | CTG | chr16 | + | 87425788 | 87425898 | MAP1LC3 B | -                                                                                                                   | UTR only   | 0.00087758 |
| ENST00000524625.1.uORF_CT G.7  | 22.87639788 | CTG | chr11 | + | 46639331 | 46651634 | ATG13     | ENST00000578626.1.uORF_CTG.7,ENST00000312040.4.uORF_CTG.12                                                          | UTR only   | 0.00087758 |
| ENST00000524625.1.uORF_GT G.3  | 22.87302942 | GTG | chr11 | + | 46639229 | 46651634 | ATG13     | ENST00000312040.4.uORF_GT.5,ENST00000578626.1.uORF_GTG.3                                                            | UTR only   | 0.00028977 |
| ENST00000268607.5.uORF_CT G.11 | 22.86249501 | CTG | chr16 | + | 87425804 | 87425914 | MAP1LC3 B | -                                                                                                                   | UTR only   | 0.00087758 |
| ENST00000268607.5.uORF_GT G.2  | 22.84703769 | GTG | chr16 | + | 87425565 | 87425879 | MAP1LC3 B | -                                                                                                                   | UTR only   | 0.00087758 |
| ENST00000359933.4.uORF_CT G.8  | 22.84159203 | CTG | chr14 | - | 96829864 | 96829652 | ATG2B     | -                                                                                                                   | UTR only   | 0.00087758 |
| ENST00000435644.2.uORF_CT G.3  | 22.83844066 | CTG | chr8  | - | 53626897 | 53626748 | RB1CC1    | ENST00000025008.5.uORF_CTG.3,ENST00000518710.1.uORF_CTG.3,ENST00000517963.1.uORF_CTG.3,ENST00000518211.1.uORF_CTG.3 | UTR only   | 0.00087758 |
| ENST00000359933.4.uORF_AT A.1  | 22.8249385  | ATA | chr14 | - | 96829434 | 96829405 | ATG2B     | -                                                                                                                   | UTR only   | 0.00070728 |
| ENST00000359933.4.uORF_CT G.7  | 22.82244591 | CTG | chr14 | - | 96829905 | 96829405 | ATG2B     | -                                                                                                                   | UTR only   | 0.00087758 |
| ENST00000268607.5.uORF_CT G.9  | 22.82026217 | CTG | chr16 | + | 87425726 | 87425914 | MAP1LC3 B | -                                                                                                                   | UTR only   | 0.00087758 |
| ENST00000268607.5.uORF_GT G.4  | 22.78492635 | GTG | chr16 | + | 87425664 | 87425879 | MAP1LC3 B | -                                                                                                                   | UTR only   | 0.00087758 |
| ENST00000359933.4.uORF_GT G.10 | 22.74310522 | GTG | chr14 | - | 96829480 | 96829223 | ATG2B     | -                                                                                                                   | CDSpartial | 0.00028977 |
| ENST00000268607.5.uORF_CT G.7  | 22.72472412 | CTG | chr16 | + | 87425611 | 87425898 | MAP1LC3 B | -                                                                                                                   | UTR only   | 0.00087758 |
| ENST00000268607.5.uORF_AT C.2  | 22.72115787 | ATC | chr16 | + | 87425769 | 87425879 | MAP1LC3 B | -                                                                                                                   | UTR only   | 0.5935874  |
| ENST00000435644.2.uORF_AC G.1  | 22.68838573 | ACG | chr8  | - | 53626771 | 53626748 | RB1CC1    | ENST00000517963.1.uORF_ACG.2,ENST00000025008.5.uORF_ACG.1,ENST00000518710.1.uORF_ACG.1,ENST00000518211.1.uORF_ACG.2 | UTR only   | 0.5749201  |
| ENST00000359933.4.uORF_CT G.17 | 22.55376007 | CTG | chr14 | - | 96829455 | 96829405 | ATG2B     | -                                                                                                                   | UTR only   | 0.00070728 |

|                                |             |     |       |   |           |           |           |                                                                                                                                                                                                                                                                                                      |            |            |
|--------------------------------|-------------|-----|-------|---|-----------|-----------|-----------|------------------------------------------------------------------------------------------------------------------------------------------------------------------------------------------------------------------------------------------------------------------------------------------------------|------------|------------|
| ENST00000524625.1.uORF_GT G.5  | 22.53624125 | GTG | chr11 | + | 46639305  | 46651638  | ATG13     | ENST00000312040.4.uORF_GTG.7,ENST00000578626.1.uORF_GTG.5,ENST00000577256.1.uORF_GTG.5                                                                                                                                                                                                               | UTR only   | 0.00031291 |
| ENST00000268607.5.uORF_AC G.5  | 22.45663213 | ACG | chr16 | + | 87425801  | 87425914  | MAP1LC3 B | -                                                                                                                                                                                                                                                                                                    | UTR only   | 0.00028977 |
| ENST00000268607.5.uORF_CT G.12 | 22.4481306  | CTG | chr16 | + | 87425814  | 87425879  | MAP1LC3 B | -                                                                                                                                                                                                                                                                                                    | UTR only   | 0.9026072  |
| ENST00000359933.4.uORF_GT G.3  | 22.44221049 | GTG | chr14 | - | 96830143  | 96830117  | ATG2B     | -                                                                                                                                                                                                                                                                                                    | UTR only   | 0.00028977 |
| ENST00000359933.4.uORF_CT G.1  | 22.41481504 | CTG | chr14 | - | 96830120  | 96829983  | ATG2B     | -                                                                                                                                                                                                                                                                                                    | UTR only   | 0.00087758 |
| ENST00000359933.4.uORF_CT G.6  | 22.4004717  | CTG | chr14 | - | 96829916  | 96829698  | ATG2B     | -                                                                                                                                                                                                                                                                                                    | UTR only   | 0.00087758 |
| ENST00000396761.2.uORF_TTG .2  | 22.39394444 | TTG | chr2  | - | 220094409 | 220092746 | ATG9A     | -                                                                                                                                                                                                                                                                                                    | CDSpartial | 0.00087758 |
| ENST00000268607.5.uORF_AC G.2  | 22.39314249 | ACG | chr16 | + | 87425436  | 87425879  | MAP1LC3 B | -                                                                                                                                                                                                                                                                                                    | UTR only   | 0.00087758 |
| ENST00000359933.4.uORF_GT G.4  | 22.38983775 | GTG | chr14 | - | 96829848  | 96829405  | ATG2B     | -                                                                                                                                                                                                                                                                                                    | UTR only   | 0.00028977 |
| ENST00000396761.2.uORF_CT G.1  | 22.38850793 | CTG | chr2  | - | 220094429 | 220094337 | ATG9A     | -                                                                                                                                                                                                                                                                                                    | UTR only   | 0.00012783 |
| ENST00000435644.2.uORF_CT G.5  | 22.3856927  | CTG | chr8  | - | 53626845  | 53599520  | RB1CC1    | ENST00000518710.1.uORF_CTG.5,ENST00000518211.1.uORF_CTG.5,ENST00000025008.5.uORF_CTG.5                                                                                                                                                                                                               | UTR only   | 0.00087758 |
| ENST00000268607.5.uORF_TTG .1  | 22.34763223 | TTG | chr16 | + | 87425528  | 87425914  | MAP1LC3 B | -                                                                                                                                                                                                                                                                                                    | UTR only   | 0.00087758 |
| ENST00000268607.5.uORF_AT G.1  | 22.34522122 | ATG | chr16 | + | 87425518  | 87425550  | MAP1LC3 B | -                                                                                                                                                                                                                                                                                                    | UTR only   | 0.00198221 |
| ENST00000359933.4.uORF_CT G.3  | 22.26916413 | CTG | chr14 | - | 96830042  | 96829983  | ATG2B     | -                                                                                                                                                                                                                                                                                                    | UTR only   | 0.00012783 |
| ENST00000268607.5.uORF_AC G.4  | 22.25403876 | ACG | chr16 | + | 87425776  | 87425898  | MAP1LC3 B | -                                                                                                                                                                                                                                                                                                    | UTR only   | 0.00028977 |
| ENST00000359933.4.uORF_GT G.7  | 22.21750215 | GTG | chr14 | - | 96829701  | 96829405  | ATG2B     | -                                                                                                                                                                                                                                                                                                    | UTR only   | 0.00087758 |
| ENST00000524625.1.uORF_TTG .1  | 22.19534253 | TTG | chr11 | + | 46639422  | 46651638  | ATG13     | ENST00000577256.1.uORF_TTG.1,ENST00000578626.1.uORF_TTG.1,ENST00000312040.4.uORF_TTG.5                                                                                                                                                                                                               | UTR only   | 0.00031291 |
| ENST00000395544.4.uORF_AT G.3  | 22.14916709 | ATG | chr17 | - | 19770873  | 19770787  | ULK2      | ENST00000361658.2.uORF_ATG.3                                                                                                                                                                                                                                                                         | UTR only   | 0.00087758 |
| ENST00000524625.1.uORF_AC G.2  | 22.1401715  | ACG | chr11 | + | 46639227  | 46639256  | ATG13     | ENST00000312040.4.uORF_AC G.5,ENST00000577256.1.uORF_AC G.2,ENST00000434074.1.uORF_AC G.5,ENST00000580238.1.uORF_AC G.2,ENST00000533325.1.uORF_AC G.2,ENST00000526508.1.uORF_AC G.2,ENST00000528494.1.uORF_AC G.1,ENST00000359513.4.uORF_AC G.1,ENST00000530500.1.uORF_AC G.2,ENST00000451945.1.uORF | UTR only   | 0.00028977 |

|                                           |             |     |       |   |           |           |              |                                                                                                                                                                                                                      |            |            |
|-------------------------------------------|-------------|-----|-------|---|-----------|-----------|--------------|----------------------------------------------------------------------------------------------------------------------------------------------------------------------------------------------------------------------|------------|------------|
|                                           |             |     |       |   |           |           |              | _ACG.5.ENST0000058141<br>6.1.uORF_ACG.2.ENST000<br>00578626.1.uORF_ACG.2,<br>ENST00000582547.1.uORF<br>_ACG.2.ENST0000058324<br>9.1.uORF_ACG.2.ENST000<br>00581438.1.uORF_ACG.2,<br>ENST00000529655.1.uORF<br>_ACG.2 |            |            |
| ENST0000<br>0396761.2.<br>uORF_CT<br>G.4  | 22.13644708 | CTG | chr2  | - | 220094285 | 220092733 | ATG9A        | ENST00000412355.1.uORF<br>_CTG.1.ENST00000428226<br>.1.uORF_CTG.1                                                                                                                                                    | CDSpartial | 0.00087758 |
| ENST0000<br>0268607.5.<br>uORF_CT<br>G.4  | 22.09871524 | CTG | chr16 | + | 87425504  | 87425914  | MAP1LC3<br>B | -                                                                                                                                                                                                                    | UTR only   | 0.00087758 |
| ENST0000<br>0268607.5.<br>uORF_CT<br>G.16 | 22.08037319 | CTG | chr16 | + | 87425904  | 87435806  | MAP1LC3<br>B | -                                                                                                                                                                                                                    | CDSpartial | 0.00087758 |
| ENST0000<br>0268607.5.<br>uORF_GT<br>G.6  | 22.05841618 | GTG | chr16 | + | 87425808  | 87425879  | MAP1LC3<br>B | -                                                                                                                                                                                                                    | UTR only   | 0.8038648  |
| ENST0000<br>0359933.4.<br>uORF_CT<br>G.13 | 22.02598084 | CTG | chr14 | - | 96829605  | 96829405  | ATG2B        | -                                                                                                                                                                                                                    | UTR only   | 0.00087758 |
| ENST0000<br>0395544.4.<br>uORF_AT<br>G.2  | 21.97928952 | ATG | chr17 | - | 19770955  | 19770923  | ULK2         | ENST00000361658.2.uORF<br>_ATG.2                                                                                                                                                                                     | UTR only   | 0.00198221 |
| ENST0000<br>0359933.4.<br>uORF_AT<br>C.1  | 21.95390449 | ATC | chr14 | - | 96829997  | 96829983  | ATG2B        | -                                                                                                                                                                                                                    | UTR only   | 4.22E-05   |
| ENST0000<br>0268607.5.<br>uORF_CT<br>G.5  | 21.90600581 | CTG | chr16 | + | 87425547  | 87425879  | MAP1LC3<br>B | -                                                                                                                                                                                                                    | UTR only   | 0.00087758 |
| ENST0000<br>0268607.5.<br>uORF_AC<br>G.6  | 21.89179004 | ACG | chr16 | + | 87425829  | 87425879  | MAP1LC3<br>B | -                                                                                                                                                                                                                    | UTR only   | 0.9026072  |
| ENST0000<br>0268607.5.<br>uORF_CT<br>G.1  | 21.83327814 | CTG | chr16 | + | 87425423  | 87425914  | MAP1LC3<br>B | -                                                                                                                                                                                                                    | UTR only   | 0.00028977 |
| ENST0000<br>0268607.5.<br>uORF_CT<br>G.3  | 21.81703078 | CTG | chr16 | + | 87425451  | 87425879  | MAP1LC3<br>B | -                                                                                                                                                                                                                    | UTR only   | 0.00087758 |
| ENST0000<br>0395544.4.<br>uORF_AT<br>G.1  | 21.80779001 | ATG | chr17 | - | 19771093  | 19771031  | ULK2         | ENST00000361658.2.uORF<br>_ATG.1                                                                                                                                                                                     | UTR only   | 0.00087758 |
| ENST0000<br>0359933.4.<br>uORF_GT<br>G.1  | 21.67267294 | GTG | chr14 | - | 96830206  | 96830117  | ATG2B        | -                                                                                                                                                                                                                    | UTR only   | 0.00035863 |
| ENST0000<br>0268607.5.<br>uORF_AC<br>G.7  | 21.64139548 | ACG | chr16 | + | 87425879  | 87425914  | MAP1LC3<br>B | -                                                                                                                                                                                                                    | UTR only   | 0.00028977 |
| ENST0000<br>0268607.5.<br>uORF_GT<br>G.7  | 21.5912967  | GTG | chr16 | + | 87425876  | 87425914  | MAP1LC3<br>B | -                                                                                                                                                                                                                    | UTR only   | 0.00028977 |
| ENST0000<br>0268607.5.<br>uORF_AT<br>A.1  | 21.52694395 | ATA | chr16 | + | 87425919  | 87435806  | MAP1LC3<br>B | -                                                                                                                                                                                                                    | CDSpartial | 0.00011838 |
| ENST0000<br>0359933.4.<br>uORF_CT<br>G.12 | 21.49477984 | CTG | chr14 | - | 96829617  | 96829405  | ATG2B        | -                                                                                                                                                                                                                    | UTR only   | 0.00087758 |
| ENST0000<br>0268607.5.<br>uORF_CT<br>G.15 | 21.43722338 | CTG | chr16 | + | 87425895  | 87435806  | MAP1LC3<br>B | -                                                                                                                                                                                                                    | CDSpartial | 0.00087758 |
| ENST0000<br>0524625.1.<br>uORF_AT<br>C.2  | 21.43346864 | ATC | chr11 | + | 46651596  | 46651634  | ATG13        | ENST00000581416.1.uORF<br>_ATC.5.ENST00000578626<br>.1.uORF_ATC.2.ENST0000<br>0312040.4.uORF_ATC.6.E                                                                                                                 | UTR only   | 0.00010328 |

|                                          |             |     |       |   |           |           |                      |                                                                                                                                         |            |            |
|------------------------------------------|-------------|-----|-------|---|-----------|-----------|----------------------|-----------------------------------------------------------------------------------------------------------------------------------------|------------|------------|
|                                          |             |     |       |   |           |           |                      | NST00000533325.1.uORF<br>ATC.4.ENST00000577256.<br>1.uORF_ATC.4                                                                         |            |            |
| ENST0000<br>0395544.4.<br>uORF_CT<br>G.6 | 21.40890177 | CTG | chr17 | - | 19770920  | 19770870  | <i>ULK2</i>          | ENST00000361658.2.uORF<br>_CTG.6                                                                                                        | UTR only   | 0.00198221 |
| ENST0000<br>0395544.4.<br>uORF_CT<br>G.9 | 21.37374192 | CTG | chr17 | - | 19770822  | 19770787  | <i>ULK2</i>          | ENST00000361658.2.uORF<br>_CTG.9                                                                                                        | UTR only   | 0.00198221 |
| ENST0000<br>0409033.3.<br>uORF_CT<br>G.1 | 21.36302505 | CTG | chr2  | - | 220094285 | 220092746 | <i>ATG9A</i>         | ENST00000456708.1.uORF<br>_CTG.1.ENST00000455079<br>.1.uORF_CTG.1.ENST0000<br>0361242.4.uORF_CTG.3.E<br>NST00000457841.1.uORF_<br>CTG.1 | CDSpartial | 0.00028901 |
| ENST0000<br>0268607.5.<br>uORF_AC<br>G.1 | 21.32654641 | ACG | chr16 | + | 87425406  | 87425879  | <i>MAP1LC3<br/>B</i> | -                                                                                                                                       | UTR only   | 0.00087758 |
| ENST0000<br>0377264.3.<br>uORF_CT<br>G.1 | 21.24221707 | CTG | chr11 | - | 64684720  | 64684571  | <i>ATG2A</i>         | ENST00000421419.2.uORF<br>_CTG.1                                                                                                        | CDSpartial | 0.00087758 |
| ENST0000<br>0268607.5.<br>uORF_ATT<br>.1 | 21.09594956 | ATT | chr16 | + | 87425526  | 87425879  | <i>MAP1LC3<br/>B</i> | -                                                                                                                                       | UTR only   | 0.00087758 |
| ENST0000<br>0268607.5.<br>uORF_CT<br>G.2 | 21.07244804 | CTG | chr16 | + | 87425446  | 87425550  | <i>MAP1LC3<br/>B</i> | -                                                                                                                                       | UTR only   | 0.00198221 |
| ENST0000<br>0395544.4.<br>uORF_CT<br>G.1 | 21.0380922  | CTG | chr17 | - | 19771099  | 19771031  | <i>ULK2</i>          | ENST00000361658.2.uORF<br>_CTG.1                                                                                                        | UTR only   | 0.00198221 |
| ENST0000<br>0274459.4.<br>uORF_GT<br>G.2 | 20.85044294 | GTG | chr5  | - | 115177508 | 115177422 | <i>ATG12</i>         | ENST00000509910.1.uORF<br>_GTG.2.ENST00000379594<br>.3.uORF_GTG.2.ENST0000<br>0513322.1.uORF_GTG.2                                      | UTR only   | 0.00012783 |
| ENST0000<br>0283290.5.<br>uORF_CT<br>G.4 | 20.69082938 | CTG | chr3  | - | 112280599 | 112280444 | <i>ATG3</i>          | ENST00000402314.2.uORF<br>_CTG.4                                                                                                        | UTR only   | 0.00087758 |
| ENST0000<br>0274459.4.<br>uORF_CT<br>G.1 | 20.64707199 | CTG | chr5  | - | 115177515 | 115177387 | <i>ATG12</i>         | ENST00000509910.1.uORF<br>_CTG.1.ENST00000513322<br>.1.uORF_CTG.1.ENST0000<br>0379594.3.uORF_CTG.1                                      | CDSpartial | 0.00087758 |
| ENST0000<br>0395544.4.<br>uORF_CT<br>G.8 | 20.61076435 | CTG | chr17 | - | 19770843  | 19770787  | <i>ULK2</i>          | ENST00000361658.2.uORF<br>_CTG.8                                                                                                        | UTR only   | 0.00087758 |
| ENST0000<br>0404914.3.<br>uORF_TTG<br>2  | 20.60000311 | TTG | chr2  | + | 242577075 | 242590458 | <i>ATG4B</i>         | ENST00000402096.1.uORF<br>_TTG.2.ENST00000400772<br>.2.uORF_TTG.2.ENST0000<br>0405546.3.uORF_TTG.2                                      | CDSpartial | 0.00087758 |
| ENST0000<br>0435644.2.<br>uORF_CT<br>G.7 | 20.5566015  | CTG | chr8  | - | 53626720  | 53599458  | <i>RB1CC1</i>        | ENST00000518211.1.uORF<br>_CTG.7.ENST0000025008<br>.5.uORF_CTG.7.ENST0000<br>0518710.1.uORF_CTG.7                                       | UTR only   | 0.00012783 |
| ENST0000<br>0283290.5.<br>uORF_AC<br>G.2 | 20.53849477 | ACG | chr3  | - | 112280776 | 112280762 | <i>ATG3</i>          | ENST00000492886.1.uORF<br>_ACG.5                                                                                                        | UTR only   | 0.00028977 |
| ENST0000<br>0395544.4.<br>uORF_AC<br>G.4 | 20.49401795 | ACG | chr17 | - | 19770825  | 19770787  | <i>ULK2</i>          | ENST00000361658.2.uORF<br>_ACG.4                                                                                                        | UTR only   | 0.00028977 |
| ENST0000<br>0274459.4.<br>uORF_AC<br>G.1 | 20.44346611 | ACG | chr5  | - | 115177484 | 115177422 | <i>ATG12</i>         | ENST00000509910.1.uORF<br>_ACG.1.ENST0000051332<br>2.1.uORF_ACG.1.ENST000<br>00379594.3.uORF_ACG.1                                      | UTR only   | 0.00035863 |
| ENST0000<br>0283290.5.<br>uORF_CT<br>G.2 | 20.38274372 | CTG | chr3  | - | 112280631 | 112280476 | <i>ATG3</i>          | ENST00000402314.2.uORF<br>_CTG.2                                                                                                        | UTR only   | 0.00087758 |
| ENST0000<br>0283290.5.<br>uORF_GT<br>G.7 | 20.21231328 | GTG | chr3  | - | 112280688 | 112280476 | <i>ATG3</i>          | ENST00000402314.2.uORF<br>_GTG.3                                                                                                        | UTR only   | 0.00028977 |
| ENST0000<br>0283290.5.<br>uORF_CT<br>G.6 | 20.15379502 | CTG | chr3  | - | 112280559 | 112280476 | <i>ATG3</i>          | ENST00000402314.2.uORF<br>_CTG.6                                                                                                        | UTR only   | 0.00087758 |



|                                |             |     |       |   |           |           |                  |                                                                                           |            |            |
|--------------------------------|-------------|-----|-------|---|-----------|-----------|------------------|-------------------------------------------------------------------------------------------|------------|------------|
| ENST00000395544.4.uORF_CT G.12 | 20.05793489 | CTG | chr17 | - | 19770773  | 19770714  | <i>ULK2</i>      | ENST00000361658.2.uORF_CT G.12                                                            | CDSpartial | 0.00087758 |
| ENST00000395544.4.uORF_CT G.2  | 20.02733777 | CTG | chr17 | - | 19771071  | 19770952  | <i>ULK2</i>      | ENST00000361658.2.uORF_CT G.2                                                             | UTR only   | 0.00087758 |
| ENST00000369076.3.uORF_GT G.3  | 19.95072728 | GTG | chr6  | - | 106773595 | 106764127 | <i>ATG5</i>      | ENST00000369070.1.uORF_GT G.3                                                             | UTR only   | 0.00028977 |
| ENST00000395544.4.uORF_GT G.2  | 19.93364542 | GTG | chr17 | - | 19771057  | 19771031  | <i>ULK2</i>      | ENST00000361658.2.uORF_GT G.2                                                             | UTR only   | 0.00028977 |
| ENST00000283290.5.uORF_CT G.5  | 19.92903567 | CTG | chr3  | - | 112280595 | 112280476 | <i>ATG3</i>      | ENST00000402314.2.uORF_CT G.5                                                             | UTR only   | 0.00087758 |
| ENST00000283290.5.uORF_GT G.3  | 19.87577402 | GTG | chr3  | - | 112280790 | 112280476 | <i>ATG3</i>      | -                                                                                         | UTR only   | 0.00011838 |
| ENST00000382384.2.uORF_CT G.2  | 19.87305743 | CTG | chr7  | + | 5229992   | 5230054   | <i>WIP12</i>     | ENST00000404704.3.uORF_CT G.3,ENST00000401525.3.uORF_CT G.3,ENST00000288828.4.uORF_CT G.3 | CDSpartial | 0.00087758 |
| ENST00000262039.4.uORF_AT G.1  | 19.84156171 | ATG | chr18 | + | 39535199  | 39535291  | <i>PIK3C3</i>    | -                                                                                         | CDSpartial | 0.00087758 |
| ENST00000369076.3.uORF_TTG .3  | 19.72040777 | TTG | chr6  | - | 106773624 | 106773412 | <i>ATG5</i>      | ENST00000369070.1.uORF_TTG.3                                                              | UTR only   | 0.00035863 |
| ENST00000268607.5.uORF_GT G.1  | 19.71676487 | GTG | chr16 | + | 87425470  | 87425550  | <i>MAP1LC3 B</i> | -                                                                                         | UTR only   | 0.00087758 |
| ENST00000274459.4.uORF_TTG .2  | 19.62694884 | TTG | chr5  | - | 115177433 | 115177422 | <i>ATG12</i>     | ENST00000509910.1.uORF_TTG.2,ENST00000513322.1.uORF_TTG.2,ENST00000379594.3.uORF_TTG.2    | UTR only   | 0.00198221 |
| ENST00000369076.3.uORF_CT G.6  | 19.55879596 | CTG | chr6  | - | 106773528 | 106773412 | <i>ATG5</i>      | ENST00000360666.4.uORF_CT G.1,ENST00000369070.1.uORF_CT G.6                               | UTR only   | 0.00035863 |
| ENST00000283290.5.uORF_GT G.14 | 19.47127638 | GTG | chr3  | - | 112280466 | 112280359 | <i>ATG3</i>      | ENST00000496423.1.uORF_CT G.3,ENST00000402314.2.uORF_CT G.10                              | CDSpartial | 0.00010328 |
| ENST00000369076.3.uORF_CT G.4  | 19.40736701 | CTG | chr6  | - | 106773549 | 106773412 | <i>ATG5</i>      | ENST00000369070.1.uORF_CT G.4                                                             | UTR only   | 0.00087758 |
| ENST00000369076.3.uORF_ATT .1  | 19.40648574 | ATT | chr6  | - | 106773620 | 106773402 | <i>ATG5</i>      | ENST00000369070.1.uORF_ATT.1                                                              | UTR only   | 0.00010328 |
| ENST00000268607.5.uORF_AT C.4  | 19.3733367  | ATC | chr16 | + | 87426023  | 87432432  | <i>MAP1LC3 B</i> | ENST00000570189.1.uORF_AT C.2,ENST00000565788.1.uORF_AT C.1                               | CDSpartial | 4.22E-05   |
| ENST00000435644.2.uORF_CT G.14 | 19.37154001 | CTG | chr8  | - | 53598077  | 53598036  | <i>RB1CC1</i>    | ENST00000518468.1.uORF_CT G.8,ENST0000025008.5.uORF_CT G.14                               | UTR only   | 0.00081058 |
| ENST00000356763.3.uORF_CT G.4  | 19.35668472 | CTG | chr3  | - | 130465595 | 130465389 | <i>PIK3R4</i>    | -                                                                                         | UTR only   | 0.00031291 |
| ENST00000577035.1.uORF_AT G.1  | 19.3118955  | ATG | chr17 | - | 7145107   | 7145093   | <i>GABARAP</i>   | ENST00000571253.1.uORF_AT G.8                                                             | UTR only   | 0.00198221 |
| ENST00000283290.5.uORF_CT G.9  | 19.28129556 | CTG | chr3  | - | 112280479 | 112280444 | <i>ATG3</i>      | ENST00000402314.2.uORF_CT G.9,ENST00000496423.1.uORF_CT G.2                               | UTR only   | 0.00070728 |
| ENST00000573928.1.uORF_CT G.1  | 19.25295933 | CTG | chr17 | - | 7145747   | 7145646   | <i>GABARAP</i>   | ENST00000302386.5.uORF_CT G.3                                                             | CDSpartial | 0.00087758 |

|                                |             |     |       |   |           |           |               |                                                                                        |            |            |
|--------------------------------|-------------|-----|-------|---|-----------|-----------|---------------|----------------------------------------------------------------------------------------|------------|------------|
| ENST00000262039.4.uORF_TTG.2   | 19.24072777 | TTG | chr18 | + | 39535202  | 39535291  | <i>PIK3C3</i> | -                                                                                      | CDSpartial | 0.00087758 |
| ENST00000382384.2.uORF_GT.G.2  | 19.16290734 | GTG | chr7  | + | 5229940   | 5229984   | <i>WIP12</i>  | ENST00000404704.3.uORF_GTG.2.ENST00000401525.3.uORF_GTG.4.ENST00000288828.4.uORF_GTG.4 | UTR only   | 0.5749201  |
| ENST00000262039.4.uORF_AC.G.1  | 19.1525576  | ACG | chr18 | + | 39535249  | 39537536  | <i>PIK3C3</i> | ENST00000586545.1.uORF_AC.G.1                                                          | CDSpartial | 4.22E-05   |
| ENST00000262039.4.uORF_GT.G.3  | 19.13857384 | GTG | chr18 | + | 39535234  | 39537536  | <i>PIK3C3</i> | ENST00000586545.1.uORF_GTG.1                                                           | CDSpartial | 4.22E-05   |
| ENST00000247178.5.uORF_GT.G.1  | 19.13701322 | GTG | chr14 | - | 55878566  | 55878381  | <i>ATG14</i>  | -                                                                                      | CDSpartial | 0.00087758 |
| ENST00000382384.2.uORF_TTG.1   | 19.10972584 | TTG | chr7  | + | 5229922   | 5229984   | <i>WIP12</i>  | ENST00000404704.3.uORF_TTG.1.ENST00000401525.3.uORF_TTG.1.ENST00000288828.4.uORF_TTG.1 | UTR only   | 0.5935874  |
| ENST00000262039.4.uORF_GT.G.4  | 19.1091534  | GTG | chr18 | + | 39535252  | 39537536  | <i>PIK3C3</i> | ENST00000586545.1.uORF_GTG.2                                                           | CDSpartial | 4.22E-05   |
| ENST00000262039.4.uORF_CT.G.2  | 19.09517645 | CTG | chr18 | + | 39535211  | 39535291  | <i>PIK3C3</i> | -                                                                                      | CDSpartial | 0.00087758 |
| ENST00000369076.3.uORF_AT.A.1  | 19.05695835 | ATA | chr6  | - | 106773611 | 106773402 | <i>ATG5</i>   | ENST00000369070.1.uORF_AT.A.1                                                          | UTR only   | 0.00010328 |
| ENST00000369076.3.uORF_CT.G.2  | 19.00486386 | CTG | chr6  | - | 106773650 | 106773402 | <i>ATG5</i>   | ENST00000369070.1.uORF_CT.G.2                                                          | UTR only   | 0.00031291 |
| ENST00000356136.3.uORF_AT.G.2  | 18.92323864 | ATG | chr11 | + | 75526261  | 75526275  | <i>UVRAG</i>  | -                                                                                      | UTR only   | 0.00198221 |
| ENST00000435644.2.uORF_AT.A.2  | 18.86909477 | ATA | chr8  | - | 53598058  | 53598026  | <i>RB1CC1</i> | ENST00000518468.1.uORF_AT.A.5.ENST0000025008.5.uORF_AT.A.3                             | CDSpartial | 4.22E-05   |
| ENST00000283290.5.uORF_GT.G.4  | 18.86647354 | GTG | chr3  | - | 112280765 | 112280730 | <i>ATG3</i>   | ENST00000492886.1.uORF_GTG.6                                                           | UTR only   | 0.00011838 |
| ENST00000435644.2.uORF_AT.C.4  | 18.82498515 | ATC | chr8  | - | 53598073  | 53598062  | <i>RB1CC1</i> | ENST0000025008.5.uORF_AT.C.4.ENST00000518468.1.uORF_AT.C.5                             | UTR only   | 0.00010328 |
| ENST00000283290.5.uORF_AC.G.1  | 18.77542305 | ACG | chr3  | - | 112280803 | 112280798 | <i>ATG3</i>   | ENST00000492886.1.uORF_AC.G.4                                                          | UTR only   | 1.06E-05   |
| ENST00000283290.5.uORF_AT.C.2  | 18.74596159 | ATC | chr3  | - | 112280412 | 112280359 | <i>ATG3</i>   | ENST00000496423.1.uORF_AT.C.1.ENST00000402314.2.uORF_AT.C.2                            | CDSpartial | 0.00010328 |
| ENST00000283290.5.uORF_GT.G.1  | 18.71003663 | GTG | chr3  | - | 112280808 | 112280476 | <i>ATG3</i>   | -                                                                                      | UTR only   | 0.00011838 |
| ENST00000356763.3.uORF_CT.G.5  | 18.70778629 | CTG | chr3  | - | 130465587 | 130465501 | <i>PIK3R4</i> | -                                                                                      | UTR only   | 0.00087758 |
| ENST00000395544.4.uORF_CT.G.11 | 18.66606084 | CTG | chr17 | - | 19770783  | 19769123  | <i>ULK2</i>   | ENST00000361658.2.uORF_CT.G.11                                                         | CDSpartial | 0.00031291 |
| ENST00000369076.3.uORF_GT.G.1  | 18.66154744 | GTG | chr6  | - | 106773658 | 106764127 | <i>ATG5</i>   | ENST00000369070.1.uORF_GTG.1                                                           | UTR only   | 0.00028977 |
| ENST00000356763.3.uORF_TTG.3   | 18.42278073 | TTG | chr3  | - | 130465601 | 130465389 | <i>PIK3R4</i> | -                                                                                      | UTR only   | 0.00031291 |

|                                          |             |     |       |   |           |           |                |                                                                                                                                         |  |            |            |
|------------------------------------------|-------------|-----|-------|---|-----------|-----------|----------------|-----------------------------------------------------------------------------------------------------------------------------------------|--|------------|------------|
| ENST0000<br>0262039.4.<br>uORF_CT<br>G.1 | 18.42182841 | CTG | chr18 | + | 39535188  | 39535220  | <i>PIK3C3</i>  | -                                                                                                                                       |  | UTR only   | 0.00198221 |
| ENST0000<br>0369076.3.<br>uORF_TTG<br>4  | 18.41827104 | TTG | chr6  | - | 106773555 | 106773412 | <i>ATG5</i>    | ENST00000369070.1.uORF<br>_TTG.4                                                                                                        |  | UTR only   | 0.00087758 |
| ENST0000<br>0356136.3.<br>uORF_AT<br>G.3 | 18.40518141 | ATG | chr11 | + | 75526406  | 75526456  | <i>UVRAG</i>   | -                                                                                                                                       |  | CDSpartial | 0.00198221 |
| ENST0000<br>0356763.3.<br>uORF_CT<br>G.2 | 18.37771116 | CTG | chr3  | - | 130465628 | 130465389 | <i>PIK3R4</i>  | -                                                                                                                                       |  | UTR only   | 0.00031291 |
| ENST0000<br>0247178.5.<br>uORF_CT<br>G.1 | 18.31038579 | CTG | chr14 | - | 55878562  | 55864117  | <i>ATG14</i>   | -                                                                                                                                       |  | CDSpartial | 0.00087758 |
| ENST0000<br>0356763.3.<br>uORF_GT<br>G.2 | 18.24265912 | GTG | chr3  | - | 130465609 | 130465544 | <i>PIK3R4</i>  | -                                                                                                                                       |  | UTR only   | 0.00028977 |
| ENST0000<br>0577035.1.<br>uORF_AT<br>C.1 | 18.17245398 | ATC | chr17 | - | 7145103   | 7144995   | <i>GABARAP</i> | -                                                                                                                                       |  | UTR only   | 0.00010328 |
| ENST0000<br>0262039.4.<br>uORF_GT<br>G.2 | 18.11147743 | GTG | chr18 | + | 39535177  | 39535233  | <i>PIK3C3</i>  | -                                                                                                                                       |  | UTR only   | 4.22E-05   |
| ENST0000<br>0262039.4.<br>uORF_GT<br>G.1 | 18.10134055 | GTG | chr18 | + | 39535172  | 39535291  | <i>PIK3C3</i>  | -                                                                                                                                       |  | CDSpartial | 0.00087758 |
| ENST0000<br>0356136.3.<br>uORF_CT<br>G.1 | 18.05692118 | CTG | chr11 | + | 75526251  | 75526259  | <i>UVRAG</i>   | -                                                                                                                                       |  | UTR only   | 7.28E-05   |
| ENST0000<br>0356763.3.<br>uORF_AT<br>G.3 | 18.0358489  | ATG | chr3  | - | 130465213 | 130465199 | <i>PIK3R4</i>  | -                                                                                                                                       |  | UTR only   | 0.00198221 |
| ENST0000<br>0356136.3.<br>uORF_AC<br>G.1 | 17.93563733 | ACG | chr11 | + | 75526288  | 75526338  | <i>UVRAG</i>   | -                                                                                                                                       |  | UTR only   | 0.5749201  |
| ENST0000<br>0262039.4.<br>uORF_TTG<br>.1 | 17.90612895 | TTG | chr18 | + | 39535175  | 39535291  | <i>PIK3C3</i>  | -                                                                                                                                       |  | CDSpartial | 0.00087758 |
| ENST0000<br>0356136.3.<br>uORF_AT<br>A.1 | 17.73175541 | ATA | chr11 | + | 75526259  | 75526363  | <i>UVRAG</i>   | -                                                                                                                                       |  | UTR only   | 0.00010328 |
| ENST0000<br>0309469.4.<br>uORF_CT<br>G.6 | 17.69762956 | CTG | chr19 | + | 10654735  | 10654770  | <i>ATG4D</i>   | ENST00000585752.1.uORF<br>_CTG.6.ENST00000588857<br>.1.uORF_CTG.6.ENST0000<br>0586417.1.uORF_CTG.7.E<br>NST00000588667.1.uORF_<br>CTG.3 |  | CDSpartial | 0.00198221 |
| ENST0000<br>0356763.3.<br>uORF_AC<br>G.2 | 17.68701686 | ACG | chr3  | - | 130465494 | 130465411 | <i>PIK3R4</i>  | -                                                                                                                                       |  | UTR only   | 0.00028977 |
| ENST0000<br>0356763.3.<br>uORF_CT<br>G.3 | 17.67805597 | CTG | chr3  | - | 130465619 | 130465389 | <i>PIK3R4</i>  | -                                                                                                                                       |  | UTR only   | 0.00031291 |
| ENST0000<br>0356136.3.<br>uORF_AT<br>G.1 | 17.6619167  | ATG | chr11 | + | 75526213  | 75526275  | <i>UVRAG</i>   | -                                                                                                                                       |  | UTR only   | 0.00198221 |
| ENST0000<br>0356763.3.<br>uORF_CT<br>G.1 | 17.61966068 | CTG | chr3  | - | 130465634 | 130465389 | <i>PIK3R4</i>  | -                                                                                                                                       |  | UTR only   | 0.00031291 |
| ENST0000<br>0369076.3.<br>uORF_AT<br>A.2 | 17.593977   | ATA | chr6  | - | 106773415 | 106764127 | <i>ATG5</i>    | ENST00000369070.1.uORF<br>_ATA.2.ENST00000360666<br>.4.uORF_ATA.1                                                                       |  | UTR only   | 0.00010328 |
| ENST0000<br>0392020.4.                   | 17.55406941 | CTG | chr2  | + | 234160394 | 234160537 | <i>ATG16L1</i> | ENST00000347464.5.uORF<br>_CTG.5.ENST00000392018<br>.1.uORF_CTG.2.ENST0000                                                              |  | CDSpartial | 0.00087758 |

|                                          |             |     |       |   |           |           |                |                                                                                                                                                                                                   |            |            |
|------------------------------------------|-------------|-----|-------|---|-----------|-----------|----------------|---------------------------------------------------------------------------------------------------------------------------------------------------------------------------------------------------|------------|------------|
| uORF_CT<br>G.2                           |             |     |       |   |           |           |                | 0444735.1.uORF_CTG.3.E<br>NST0000041968I.1.uORF_<br>CTG.3.ENST00000392017.<br>4.uORF_CTG.5.ENST0000<br>0373525.5.uORF_CTG.3.E<br>NST0000039202I.3.uORF_<br>CTG.3.ENST00000417017.<br>1.uORF_CTG.2 |            |            |
| ENST0000<br>0262039.4.<br>uORF_ATT<br>.1 | 17.53767605 | ATT | chr18 | + | 39535195  | 39535233  | <i>PIK3C3</i>  | -                                                                                                                                                                                                 | UTR only   | 4.22E-05   |
| ENST0000<br>0356763.3.<br>uORF_AT<br>G.1 | 17.52941943 | ATG | chr3  | - | 130465477 | 130465457 | <i>PIK3R4</i>  | -                                                                                                                                                                                                 | UTR only   | 0.00198221 |
| ENST0000<br>0309469.4.<br>uORF_CT<br>G.4 | 17.46153954 | CTG | chr19 | + | 10654647  | 10654667  | <i>ATG4D</i>   | ENST00000588857.1.uORF_<br>CTG.4.ENST00000586417<br>.1.uORF_CTG.5.ENST0000<br>0585752.1.uORF_CTG.4.E<br>NST00000588667.1.uORF_<br>CTG.1                                                           | UTR only   | 0.00198221 |
| ENST0000<br>0247178.5.<br>uORF_AC<br>G.1 | 17.44783318 | ACG | chr14 | - | 55878568  | 55878563  | <i>ATG14</i>   | -                                                                                                                                                                                                 | UTR only   | 1.06E-05   |
| ENST0000<br>0356763.3.<br>uORF_CT<br>G.6 | 17.43486146 | CTG | chr3  | - | 130465452 | 130465411 | <i>PIK3R4</i>  | -                                                                                                                                                                                                 | UTR only   | 0.00198221 |
| ENST0000<br>0356763.3.<br>uORF_GT<br>G.3 | 17.42822723 | GTG | chr3  | - | 130465550 | 130465389 | <i>PIK3R4</i>  | -                                                                                                                                                                                                 | UTR only   | 0.00010328 |
| ENST0000<br>0356763.3.<br>uORF_GT<br>G.7 | 17.41019289 | GTG | chr3  | - | 130465409 | 130465389 | <i>PIK3R4</i>  | -                                                                                                                                                                                                 | UTR only   | 0.00028977 |
| ENST0000<br>0356136.3.<br>uORF_TTG<br>.3 | 17.40995856 | TTG | chr11 | + | 75526433  | 75526456  | <i>UVRAG</i>   | -                                                                                                                                                                                                 | CDSpartial | 0.9026072  |
| ENST0000<br>0577035.1.<br>uORF_CT<br>G.1 | 17.396805   | CTG | chr17 | - | 7145134   | 7145093   | <i>GABARAP</i> | ENST00000571253.1.uORF_<br>CTG.13                                                                                                                                                                 | UTR only   | 0.00081058 |
| ENST0000<br>0309469.4.<br>uORF_CT<br>G.2 | 17.39075654 | CTG | chr19 | + | 10654627  | 10654770  | <i>ATG4D</i>   | ENST00000586417.1.uORF_<br>CTG.3.ENST00000585752<br>.1.uORF_CTG.2.ENST0000<br>0588857.1.uORF_CTG.2                                                                                                | CDSpartial | 0.8038648  |
| ENST0000<br>0356136.3.<br>uORF_TTG<br>.1 | 17.38264632 | TTG | chr11 | + | 75526246  | 75526275  | <i>UVRAG</i>   | -                                                                                                                                                                                                 | UTR only   | 0.00198221 |
| ENST0000<br>0356136.3.<br>uORF_GT<br>G.5 | 17.35236752 | GTG | chr11 | + | 75526385  | 75526456  | <i>UVRAG</i>   | -                                                                                                                                                                                                 | CDSpartial | 0.00087758 |
| ENST0000<br>0577035.1.<br>uORF_GT<br>G.2 | 17.30558947 | GTG | chr17 | - | 7145125   | 7145093   | <i>GABARAP</i> | ENST00000571253.1.uORF_<br>GTG.13                                                                                                                                                                 | UTR only   | 0.00081058 |
| ENST0000<br>0577035.1.<br>uORF_GT<br>G.1 | 17.28932418 | GTG | chr17 | - | 7145137   | 7145093   | <i>GABARAP</i> | ENST00000571253.1.uORF_<br>GTG.12                                                                                                                                                                 | UTR only   | 0.00081058 |
| ENST0000<br>0356763.3.<br>uORF_AT<br>C.2 | 17.28374745 | ATC | chr3  | - | 130465511 | 130465389 | <i>PIK3R4</i>  | -                                                                                                                                                                                                 | UTR only   | 0.00010328 |
| ENST0000<br>0356763.3.<br>uORF_AT<br>C.1 | 17.26938662 | ATC | chr3  | - | 130465565 | 130465389 | <i>PIK3R4</i>  | -                                                                                                                                                                                                 | UTR only   | 0.00010328 |
| ENST0000<br>0356136.3.<br>uORF_GT<br>G.1 | 17.11527883 | GTG | chr11 | + | 75526237  | 75526275  | <i>UVRAG</i>   | -                                                                                                                                                                                                 | UTR only   | 0.00198221 |
| ENST0000<br>0356763.3.<br>uORF_AC<br>G.1 | 17.1064488  | ACG | chr3  | - | 130465523 | 130465389 | <i>PIK3R4</i>  | -                                                                                                                                                                                                 | UTR only   | 0.00010328 |
| ENST0000<br>0356763.3.                   | 17.05270698 | ACG | chr3  | - | 130465481 | 130465389 | <i>PIK3R4</i>  | -                                                                                                                                                                                                 | UTR only   | 0.00010328 |

|                                           |             |     |       |   |           |           |               |   |            |            |
|-------------------------------------------|-------------|-----|-------|---|-----------|-----------|---------------|---|------------|------------|
| uORF_AC<br>G.3                            |             |     |       |   |           |           |               |   |            |            |
| ENST0000<br>0277746.6.<br>uORF_GT<br>G.1  | 17.00122343 | GTG | chr10 | + | 64893074  | 64911922  | <i>NRBF2</i>  | - | CDSpartial | 0.00031291 |
| ENST0000<br>0356136.3.<br>uORF_CT<br>G.5  | 16.89354622 | CTG | chr11 | + | 75526365  | 75562974  | <i>UVRAG</i>  | - | CDSpartial | 0.00087758 |
| ENST0000<br>0356763.3.<br>uORF_CT<br>G.7  | 16.89158985 | CTG | chr3  | - | 130465395 | 130465339 | <i>PIK3R4</i> | - | UTR only   | 0.00087758 |
| ENST0000<br>0356763.3.<br>uORF_GT<br>G.8  | 16.87835529 | GTG | chr3  | - | 130465202 | 130465191 | <i>PIK3R4</i> | - | UTR only   | 0.00028977 |
| ENST0000<br>0356136.3.<br>uORF_GT<br>G.4  | 16.85572423 | GTG | chr11 | + | 75526382  | 75526456  | <i>UVRAG</i>  | - | CDSpartial | 0.00087758 |
| ENST0000<br>0356763.3.<br>uORF_GT<br>G.4  | 16.84969217 | GTG | chr3  | - | 130465547 | 130465389 | <i>PIK3R4</i> | - | UTR only   | 0.00010328 |
| ENST0000<br>0356763.3.<br>uORF_TTG<br>2   | 16.77169826 | TTG | chr3  | - | 130465637 | 130465389 | <i>PIK3R4</i> | - | UTR only   | 0.00031291 |
| ENST0000<br>0277746.6.<br>uORF_CT<br>G.1  | 16.71159566 | CTG | chr10 | + | 64893107  | 64911922  | <i>NRBF2</i>  | - | CDSpartial | 0.00031291 |
| ENST0000<br>0356763.3.<br>uORF_GT<br>G.1  | 16.56306985 | GTG | chr3  | - | 130465614 | 130465609 | <i>PIK3R4</i> | - | UTR only   | 1.06E-05   |
| ENST0000<br>0356763.3.<br>uORF_GT<br>G.5  | 16.56306985 | GTG | chr3  | - | 130465519 | 130465514 | <i>PIK3R4</i> | - | UTR only   | 1.06E-05   |
| ENST0000<br>0356763.3.<br>uORF_CT<br>G.8  | 16.55729357 | CTG | chr3  | - | 130465392 | 130465339 | <i>PIK3R4</i> | - | UTR only   | 0.00198221 |
| ENST0000<br>0356763.3.<br>uORF_GT<br>G.6  | 16.49794955 | GTG | chr3  | - | 130465425 | 130465411 | <i>PIK3R4</i> | - | UTR only   | 0.00028977 |
| ENST0000<br>0356763.3.<br>uORF_AT<br>A.1  | 16.4668256  | ATA | chr3  | - | 130464103 | 130464095 | <i>PIK3R4</i> | - | UTR only   | 3.78E-06   |
| ENST0000<br>0356763.3.<br>uORF_TTG<br>.1  | 16.45915025 | TTG | chr3  | - | 130465660 | 130465616 | <i>PIK3R4</i> | - | UTR only   | 0.00198221 |
| ENST0000<br>0356763.3.<br>uORF_TTG<br>.4  | 16.40326533 | TTG | chr3  | - | 130465427 | 130465389 | <i>PIK3R4</i> | - | UTR only   | 0.00198221 |
| ENST0000<br>0356763.3.<br>uORF_CT<br>G.12 | 16.40179242 | CTG | chr3  | - | 130465255 | 130465220 | <i>PIK3R4</i> | - | UTR only   | 0.00081058 |
| ENST0000<br>0356763.3.<br>uORF_AT<br>C.4  | 16.34007543 | ATC | chr3  | - | 130465336 | 130465220 | <i>PIK3R4</i> | - | UTR only   | 0.00011838 |
| ENST0000<br>0356763.3.<br>uORF_CT<br>G.13 | 16.17561194 | CTG | chr3  | - | 130465252 | 130465220 | <i>PIK3R4</i> | - | UTR only   | 0.00081058 |
| ENST0000<br>0356763.3.<br>uORF_AT<br>C.3  | 16.15589081 | ATC | chr3  | - | 130465439 | 130465389 | <i>PIK3R4</i> | - | UTR only   | 0.00010328 |
| ENST0000<br>0277746.6.<br>uORF_TTG<br>.1  | 16.14664672 | TTG | chr10 | + | 64893083  | 64911922  | <i>NRBF2</i>  | - | CDSpartial | 0.00031291 |
| ENST0000<br>0356136.3.                    | 16.1390966  | CTG | chr11 | + | 75526319  | 75526363  | <i>UVRAG</i>  | - | UTR only   | 0.00198221 |

|                                           |             |     |       |   |           |           |                |                                                                                                    |            |            |
|-------------------------------------------|-------------|-----|-------|---|-----------|-----------|----------------|----------------------------------------------------------------------------------------------------|------------|------------|
| uORF_CT<br>G.2                            |             |     |       |   |           |           |                |                                                                                                    |            |            |
| ENST0000<br>0356136.3.<br>uORF_CT<br>G.6  | 16.04373206 | CTG | chr11 | + | 75526443  | 75562974  | <i>UVRAG</i>   | -                                                                                                  | CDSpartial | 0.00087758 |
| ENST0000<br>0356136.3.<br>uORF_CT<br>G.3  | 16.016688   | CTG | chr11 | + | 75526323  | 75526331  | <i>UVRAG</i>   | -                                                                                                  | UTR only   | 7.28E-05   |
| ENST0000<br>0356763.3.<br>uORF_CT<br>G.9  | 16.00916021 | CTG | chr3  | - | 130465342 | 130465220 | <i>PIK3R4</i>  | -                                                                                                  | UTR only   | 0.00035863 |
| ENST0000<br>0356136.3.<br>uORF_GT<br>G.2  | 15.99907146 | GTG | chr11 | + | 75526338  | 75562974  | <i>UVRAG</i>   | -                                                                                                  | CDSpartial | 0.00028977 |
| ENST0000<br>0277746.6.<br>uORF_GT<br>G.2  | 15.95492619 | GTG | chr10 | + | 64893077  | 64911922  | <i>NRBF2</i>   | -                                                                                                  | CDSpartial | 0.00031291 |
| ENST0000<br>0356763.3.<br>uORF_AT<br>G.2  | 15.95034797 | ATG | chr3  | - | 130465290 | 130465270 | <i>PIK3R4</i>  | -                                                                                                  | UTR only   | 0.00081058 |
| ENST0000<br>0356136.3.<br>uORF_CT<br>G.4  | 15.94777107 | CTG | chr11 | + | 75526328  | 75526363  | <i>UVRAG</i>   | -                                                                                                  | UTR only   | 0.00198221 |
| ENST0000<br>0356763.3.<br>uORF_CT<br>G.10 | 15.94483106 | CTG | chr3  | - | 130465324 | 130465220 | <i>PIK3R4</i>  | -                                                                                                  | UTR only   | 0.00035863 |
| ENST0000<br>0577035.1.<br>uORF_ATT<br>.1  | 15.91913518 | ATT | chr17 | - | 7145092   | 7145087   | <i>GABARAP</i> | ENST00000571253.1.uORF<br>_ATT.6                                                                   | UTR only   | 3.78E-06   |
| ENST0000<br>0356763.3.<br>uORF_ATT<br>.2  | 15.91598329 | ATT | chr3  | - | 130464106 | 130464095 | <i>PIK3R4</i>  | -                                                                                                  | UTR only   | 0.00010328 |
| ENST0000<br>0589316.1.<br>uORF_CT<br>G.1  | 15.83846038 | CTG | chr17 | - | 66453617  | 66453522  | <i>WIPI1</i>   | ENST00000546360.1.uORF<br>_CTG.1                                                                   | CDSpartial | 0.00087758 |
| ENST0000<br>0356763.3.<br>uORF_CT<br>G.14 | 15.83104813 | CTG | chr3  | - | 130465194 | 130463989 | <i>PIK3R4</i>  | -                                                                                                  | CDSpartial | 0.00035863 |
| ENST0000<br>0356763.3.<br>uORF_TTG<br>.7  | 15.76010497 | TTG | chr3  | - | 130464070 | 130464014 | <i>PIK3R4</i>  | -                                                                                                  | CDSpartial | 0.00031291 |
| ENST0000<br>0589316.1.<br>uORF_GT<br>G.2  | 15.69587679 | GTG | chr17 | - | 66453609  | 66449126  | <i>WIPI1</i>   | -                                                                                                  | CDSpartial | 0.00028977 |
| ENST0000<br>0356763.3.<br>uORF_AC<br>G.4  | 15.51843586 | ACG | chr3  | - | 130465249 | 130465220 | <i>PIK3R4</i>  | -                                                                                                  | UTR only   | 0.00011838 |
| ENST0000<br>0589316.1.<br>uORF_GT<br>G.1  | 15.40237401 | GTG | chr17 | - | 66453637  | 66453611  | <i>WIPI1</i>   | -                                                                                                  | UTR only   | 0.5749201  |
| ENST0000<br>0356763.3.<br>uORF_CT<br>G.11 | 15.28551915 | CTG | chr3  | - | 130465296 | 130465270 | <i>PIK3R4</i>  | -                                                                                                  | UTR only   | 0.00081058 |
| ENST0000<br>0356763.3.<br>uORF_AT<br>C.5  | 15.27095956 | ATC | chr3  | - | 130465301 | 130465287 | <i>PIK3R4</i>  | -                                                                                                  | UTR only   | 0.00010328 |
| ENST0000<br>0401525.3.<br>uORF_GT<br>G.3  | 15.18996793 | GTG | chr7  | + | 5229933   | 5229995   | <i>WIPI2</i>   | ENST00000288828.4.uORF<br>_GTG.3,ENST00000404704<br>.3.uORF_GTG.1,ENST0000<br>0382384.2.uORF_GTG.1 | UTR only   | 0.00028977 |
| ENST0000<br>0356763.3.<br>uORF_TTG<br>.5  | 15.13267924 | TTG | chr3  | - | 130465204 | 130465199 | <i>PIK3R4</i>  | -                                                                                                  | UTR only   | 7.28E-05   |
| ENST0000<br>0277746.6.                    | 15.04739546 | TTG | chr10 | + | 64893086  | 64911922  | <i>NRBF2</i>   | -                                                                                                  | CDSpartial | 0.00031291 |

|                                           |             |     |       |   |           |           |                |                                                                                                                                                                                                                                             |            |            |  |
|-------------------------------------------|-------------|-----|-------|---|-----------|-----------|----------------|---------------------------------------------------------------------------------------------------------------------------------------------------------------------------------------------------------------------------------------------|------------|------------|--|
| uORF_TTG<br>.2                            |             |     |       |   |           |           |                |                                                                                                                                                                                                                                             |            |            |  |
| ENST0000<br>0409618.1.<br>uORF_TTG<br>.1  | 14.97890735 | TTG | chr2  | - | 220094056 | 220093832 | <i>ATG9A</i>   | ENST00000432520.1.uORF_TTG.1                                                                                                                                                                                                                | UTR only   | 0.00031291 |  |
| ENST0000<br>0409618.1.<br>uORF_TTG<br>.2  | 14.91267355 | TTG | chr2  | - | 220094046 | 220093840 | <i>ATG9A</i>   | ENST00000443140.1.uORF_TTG.1.ENST00000432520.1.uORF_TTG.2                                                                                                                                                                                   | UTR only   | 0.00087758 |  |
| ENST0000<br>0401525.3.<br>uORF_CT<br>G.2  | 14.74149362 | CTG | chr7  | + | 5229981   | 5229995   | <i>WIPI2</i>   | ENST00000382384.2.uORF_CTG.1.ENST00000288828.4.uORF_CTG.2.ENST00000404704.3.uORF_CTG.2                                                                                                                                                      | UTR only   | 0.9026072  |  |
| ENST0000<br>0373525.5.<br>uORF_ATT<br>.2  | 14.72107301 | ATT | chr2  | + | 234160381 | 234160452 | <i>ATG16L1</i> | ENST00000417017.1.uORF_ATT.2.ENST00000419681.1.uORF_ATT.2.ENST00000392018.1.uORF_ATT.2.ENST00000392021.3.uORF_ATT.2.ENST00000347464.5.uORF_ATT.3.ENST00000392017.4.uORF_ATT.3.ENST00000444735.1.uORF_ATT.2.ENST00000392020.4.uORF_ATT.2     | UTR only   | 0.5935874  |  |
| ENST0000<br>0589316.1.<br>uORF_CT<br>G.4  | 14.43662787 | CTG | chr17 | - | 66453588  | 66449126  | <i>WIPI1</i>   | -                                                                                                                                                                                                                                           | CDSpartial | 0.00087758 |  |
| ENST0000<br>0409618.1.<br>uORF_CT<br>G.5  | 14.22534183 | CTG | chr2  | - | 220093971 | 220093840 | <i>ATG9A</i>   | ENST00000443140.1.uORF_CTG.4.ENST00000432520.1.uORF_CTG.5                                                                                                                                                                                   | UTR only   | 0.00087758 |  |
| ENST0000<br>0409618.1.<br>uORF_GT<br>G.3  | 14.22319716 | GTG | chr2  | - | 220093965 | 220093840 | <i>ATG9A</i>   | ENST00000443140.1.uORF_GTG.3.ENST00000432520.1.uORF_GTG.3                                                                                                                                                                                   | UTR only   | 0.00028977 |  |
| ENST0000<br>0401525.3.<br>uORF_GT<br>G.1  | 13.99432102 | GTG | chr7  | + | 5229835   | 5229984   | <i>WIPI2</i>   | ENST00000288828.4.uORF_GTG.1                                                                                                                                                                                                                | UTR only   | 0.00031291 |  |
| ENST0000<br>0409618.1.<br>uORF_GT<br>G.6  | 13.86907632 | GTG | chr2  | - | 220093828 | 220092733 | <i>ATG9A</i>   | ENST00000436856.1.uORF_GTG.3.ENST00000443140.1.uORF_GTG.6                                                                                                                                                                                   | CDSpartial | 0.00028977 |  |
| ENST0000<br>0409618.1.<br>uORF_CT<br>G.11 | 13.86396792 | CTG | chr2  | - | 220093843 | 220093832 | <i>ATG9A</i>   | ENST00000436856.1.uORF_CTG.6.ENST00000443140.1.uORF_CTG.10.ENST00000432520.1.uORF_CTG.11                                                                                                                                                    | UTR only   | 0.00198221 |  |
| ENST0000<br>0409618.1.<br>uORF_AC<br>G.2  | 13.72067645 | ACG | chr2  | - | 220093860 | 220093840 | <i>ATG9A</i>   | ENST00000443140.1.uORF_AC.2.ENST00000436856.1.uORF_AC.1.ENST00000432520.1.uORF_AC.2                                                                                                                                                         | UTR only   | 0.00028977 |  |
| ENST0000<br>0409618.1.<br>uORF_CT<br>G.9  | 13.53254647 | CTG | chr2  | - | 220093890 | 220093840 | <i>ATG9A</i>   | ENST00000436856.1.uORF_CTG.4.ENST00000432520.1.uORF_CTG.9.ENST00000443140.1.uORF_CTG.8                                                                                                                                                      | UTR only   | 0.00198221 |  |
| ENST0000<br>0409618.1.<br>uORF_CT<br>G.17 | 13.51687055 | CTG | chr2  | - | 220093187 | 220092733 | <i>ATG9A</i>   | ENST00000443140.1.uORF_CTG.14.ENST0000045784.1.1.uORF_CTG.4.ENST00000409033.3.uORF_CTG.5.ENST00000456708.1.uORF_CTG.5.ENST00000361242.4.uORF_CTG.7.ENST00000434939.1.uORF_CTG.10.ENST00000436856.1.uORF_CTG.10.ENST00000455079.1.uORF_CTG.5 | CDSpartial | 0.00087758 |  |
| ENST0000<br>0409618.1.<br>uORF_CT<br>G.3  | 13.47719393 | CTG | chr2  | - | 220094024 | 220093926 | <i>ATG9A</i>   | ENST00000432520.1.uORF_CTG.3.ENST00000443140.1.uORF_CTG.2                                                                                                                                                                                   | UTR only   | 0.00035863 |  |
| ENST0000<br>0409618.1.<br>uORF_GT<br>G.5  | 13.38177065 | GTG | chr2  | - | 220093831 | 220092733 | <i>ATG9A</i>   | ENST00000436856.1.uORF_GTG.2.ENST00000443140.1.uORF_GTG.5                                                                                                                                                                                   | CDSpartial | 0.00028977 |  |
| ENST0000<br>0409618.1.<br>uORF_GT<br>G.4  | 13.35139064 | GTG | chr2  | - | 220093835 | 220093797 | <i>ATG9A</i>   | ENST00000436856.1.uORF_GTG.1.ENST00000443140.1.uORF_GTG.4.ENST00000432520.1.uORF_GTG.4                                                                                                                                                      | UTR only   | 0.00028977 |  |
| ENST0000<br>0409618.1.<br>uORF_AC<br>G.3  | 13.26334605 | ACG | chr2  | - | 220093757 | 220092746 | <i>ATG9A</i>   | ENST00000443140.1.uORF_AC.3.ENST00000436856.1.uORF_AC.2                                                                                                                                                                                     | CDSpartial | 0.00012783 |  |

|                                |             |     |       |   |           |           |                  |                                                            |            |            |
|--------------------------------|-------------|-----|-------|---|-----------|-----------|------------------|------------------------------------------------------------|------------|------------|
| ENST00000409618.1.uORF_CT G.14 | 13.10979603 | CTG | chr2  | - | 220093771 | 220092733 | <i>ATG9A</i>     | ENST00000443140.1.uORF_CTG.13,ENST00000436856.1.uORF_CTG.9 | CDSpartial | 0.00087758 |
| ENST00000409618.1.uORF_GT G.2  | 13.04408058 | GTG | chr2  | - | 220093967 | 220093926 | <i>ATG9A</i>     | ENST00000432520.1.uORF_GTG.2,ENST00000443140.1.uORF_GTG.2  | UTR only   | 0.00011838 |
| ENST00000409618.1.uORF_CT G.13 | 13.03979488 | CTG | chr2  | - | 220093819 | 220092733 | <i>ATG9A</i>     | ENST00000436856.1.uORF_CTG.8,ENST00000443140.1.uORF_CTG.12 | CDSpartial | 0.00087758 |
| ENST00000409618.1.uORF_CT G.6  | 12.34076587 | CTG | chr2  | - | 220093931 | 220093926 | <i>ATG9A</i>     | ENST00000432520.1.uORF_CTG.6,ENST00000443140.1.uORF_CTG.5  | UTR only   | 7.28E-05   |
| ENST00000371120.3.uORF_GT G.5  | 11.70672367 | GTG | chr1  | + | 63269430  | 63269480  | <i>ATG4C</i>     | ENST00000317868.4.uORF_GTG.6,ENST00000371118.1.uORF_GTG.2  | CDSpartial | 0.00198221 |
| ENST00000402314.2.uORF_GT G.2  | 11.68319751 | GTG | chr3  | - | 112280692 | 112280624 | <i>ATG3</i>      | ENST00000283290.5.uORF_GTG.6                               | UTR only   | 0.00028977 |
| ENST00000371120.3.uORF_CT G.3  | 11.67210865 | CTG | chr1  | + | 63249824  | 63269406  | <i>ATG4C</i>     | ENST00000317868.4.uORF_CTG.3                               | UTR only   | 0.00012783 |
| ENST00000540647.1.uORF_TTG 2   | 11.58312842 | TTG | chr12 | + | 132402904 | 132403185 | <i>ULK1</i>      | -                                                          | CDSpartial | 0.00087758 |
| ENST00000371120.3.uORF_CT G.5  | 11.56968884 | CTG | chr1  | + | 63249854  | 63269406  | <i>ATG4C</i>     | ENST00000317868.4.uORF_CTG.5                               | UTR only   | 0.00012783 |
| ENST00000540647.1.uORF_GT G.8  | 11.43343087 | GTG | chr12 | + | 132402964 | 132403185 | <i>ULK1</i>      | -                                                          | CDSpartial | 0.00087758 |
| ENST00000397709.1.uORF_AT C.1  | 11.42789538 | ATC | chr20 | + | 33146624  | 33147024  | <i>MAP1LC3 A</i> | ENST00000360668.3.uORF_ATC.7                               | CDSpartial | 0.325226   |
| ENST00000371120.3.uORF_AC G.1  | 11.42076709 | ACG | chr1  | + | 63249835  | 63269480  | <i>ATG4C</i>     | ENST00000317868.4.uORF_ACG.1                               | CDSpartial | 0.00087758 |
| ENST00000371120.3.uORF_CT G.4  | 11.24733091 | CTG | chr1  | + | 63249839  | 63269406  | <i>ATG4C</i>     | ENST00000317868.4.uORF_CTG.4                               | UTR only   | 0.00012783 |
| ENST00000371120.3.uORF_GT G.4  | 11.20317934 | GTG | chr1  | + | 63249862  | 63269480  | <i>ATG4C</i>     | ENST00000317868.4.uORF_GTG.4                               | CDSpartial | 0.00087758 |
| ENST00000540647.1.uORF_CT G.4  | 11.19966148 | CTG | chr12 | + | 132402956 | 132403117 | <i>ULK1</i>      | -                                                          | CDSpartial | 0.00087758 |
| ENST00000540647.1.uORF_CT G.3  | 11.18848547 | CTG | chr12 | + | 132402901 | 132403185 | <i>ULK1</i>      | -                                                          | CDSpartial | 0.00087758 |
| ENST00000371120.3.uORF_GT G.2  | 11.11404327 | GTG | chr1  | + | 63249845  | 63269406  | <i>ATG4C</i>     | ENST00000317868.4.uORF_GTG.2                               | UTR only   | 4.22E-05   |
| ENST00000540647.1.uORF_TTG 4   | 11.0851393  | TTG | chr12 | + | 132402949 | 132403185 | <i>ULK1</i>      | -                                                          | CDSpartial | 0.00087758 |
| ENST00000371120.3.uORF_TTG 1   | 11.06187149 | TTG | chr1  | + | 63249860  | 63269406  | <i>ATG4C</i>     | ENST00000317868.4.uORF_TTG.1                               | UTR only   | 0.00028901 |
| ENST00000540647.1.uORF_AT A.2  | 10.94765342 | ATA | chr12 | + | 132402919 | 132403185 | <i>ULK1</i>      | -                                                          | CDSpartial | 0.00087758 |
| ENST00000402314.2.uORF_CT G.1  | 10.91246553 | CTG | chr3  | - | 112280647 | 112280624 | <i>ATG3</i>      | ENST00000283290.5.uORF_CTG.1                               | UTR only   | 0.9026072  |



|                                |             |     |       |   |           |           |               |                                                                                        |            |            |
|--------------------------------|-------------|-----|-------|---|-----------|-----------|---------------|----------------------------------------------------------------------------------------|------------|------------|
| ENST00000402314.2.uORF_GT G.1  | 10.88450794 | GTG | chr3  | - | 112280733 | 112280476 | <i>ATG3</i>   | ENST00000283290.5.uORF_GTG.5                                                           | UTR only   | 0.00028977 |
| ENST00000402314.2.uORF_GT G.4  | 10.8124608  | GTG | chr3  | - | 112280686 | 112280624 | <i>ATG3</i>   | ENST00000283290.5.uORF_GTG.8                                                           | UTR only   | 0.00028977 |
| ENST00000371120.3.uORF_GT G.3  | 10.73488077 | GTG | chr1  | + | 63249847  | 63269480  | <i>ATG4C</i>  | ENST00000317868.4.uORF_GTG.3                                                           | CDSpartial | 0.00087758 |
| ENST00000402314.2.uORF_CT G.11 | 10.69062782 | CTG | chr3  | - | 112280439 | 112280359 | <i>ATG3</i>   | ENST00000283290.5.uORF_CTG.11,ENST00000496423.1.uORF_CTG.4                             | CDSpartial | 0.00031291 |
| ENST00000435510.2.uORF_AT C.1  | 10.65440135 | ATC | chr10 | + | 64893103  | 64893207  | <i>NRBF2</i>  | ENST00000277746.6.uORF_ATC.1                                                           | CDSpartial | 0.00010328 |
| ENST00000371120.3.uORF_CT G.6  | 10.57207427 | CTG | chr1  | + | 63249869  | 63269406  | <i>ATG4C</i>  | ENST00000317868.4.uORF_CTG.6                                                           | UTR only   | 0.00028901 |
| ENST00000402314.2.uORF_CT G.3  | 10.50565114 | CTG | chr3  | - | 112280620 | 112280444 | <i>ATG3</i>   | ENST00000283290.5.uORF_CTG.3                                                           | UTR only   | 0.00087758 |
| ENST00000025008.5.uORF_TTG .2  | 10.48909821 | TTG | chr8  | - | 53626833  | 53599520  | <i>RB1CC1</i> | ENST00000518211.1.uORF_TTG.2,ENST00000435644.2.uORF_TTG.2,ENST00000518710.1.uORF_TTG.2 | UTR only   | 0.00087758 |
| ENST00000371120.3.uORF_TTG .2  | 10.48728638 | TTG | chr1  | + | 63249890  | 63269406  | <i>ATG4C</i>  | ENST00000317868.4.uORF_TTG.2                                                           | UTR only   | 0.00028901 |
| ENST00000371120.3.uORF_CT G.7  | 10.42069765 | CTG | chr1  | + | 63249872  | 63269406  | <i>ATG4C</i>  | ENST00000317868.4.uORF_CTG.7                                                           | UTR only   | 0.00028901 |
| ENST00000540647.1.uORF_GT G.7  | 10.34550255 | GTG | chr12 | + | 132402962 | 132403117 | <i>ULK1</i>   | -                                                                                      | CDSpartial | 0.00028977 |
| ENST00000540647.1.uORF_GT G.9  | 10.17678026 | GTG | chr12 | + | 132402974 | 132403117 | <i>ULK1</i>   | -                                                                                      | CDSpartial | 0.00028977 |
| ENST00000402314.2.uORF_AT G.1  | 10.15854629 | ATG | chr3  | - | 112280476 | 112280444 | <i>ATG3</i>   | ENST00000283290.5.uORF_ATG.1,ENST00000496423.1.uORF_ATG.1                              | UTR only   | 0.00070728 |
| ENST00000540647.1.uORF_GT G.5  | 10.13920879 | GTG | chr12 | + | 132402892 | 132403185 | <i>ULK1</i>   | -                                                                                      | CDSpartial | 0.00087758 |
| ENST00000402314.2.uORF_CT G.8  | 10.01273575 | CTG | chr3  | - | 112280493 | 112280476 | <i>ATG3</i>   | ENST00000283290.5.uORF_CTG.8,ENST00000496423.1.uORF_CTG.1                              | UTR only   | 0.00198221 |
| ENST00000435510.2.uORF_TTG .3  | 10.00042496 | TTG | chr10 | + | 64893162  | 64911930  | <i>NRBF2</i>  | -                                                                                      | CDSpartial | 0.00081058 |
| ENST00000402314.2.uORF_GT G.7  | 9.983679738 | GTG | chr3  | - | 112280557 | 112280444 | <i>ATG3</i>   | ENST00000283290.5.uORF_GTG.11                                                          | UTR only   | 0.00087758 |
| ENST00000371120.3.uORF_ATT .1  | 9.930553417 | ATT | chr1  | + | 63249888  | 63269398  | <i>ATG4C</i>  | ENST00000317868.4.uORF_ATT.1                                                           | UTR only   | 0.00010328 |
| ENST00000435510.2.uORF_TTG .2  | 9.923467858 | TTG | chr10 | + | 64893114  | 64911930  | <i>NRBF2</i>  | -                                                                                      | CDSpartial | 0.00198221 |
| ENST00000025008.5.uORF_TTG .3  | 9.765606241 | TTG | chr8  | - | 53626761  | 53599520  | <i>RB1CC1</i> | ENST00000518211.1.uORF_TTG.3,ENST00000518710.1.uORF_TTG.3,ENST00000435644.2.uORF_TTG.3 | UTR only   | 0.00087758 |
| ENST00000402314.2.uORF_GT G.6  | 9.760204455 | GTG | chr3  | - | 112280590 | 112280444 | <i>ATG3</i>   | ENST00000283290.5.uORF_GTG.10                                                          | UTR only   | 0.00087758 |

|                                |             |     |       |   |           |           |       |                                                                                        |            |            |
|--------------------------------|-------------|-----|-------|---|-----------|-----------|-------|----------------------------------------------------------------------------------------|------------|------------|
| ENST00000402314.2.uORF_CT G.7  | 9.746648467 | CTG | chr3  | - | 112280553 | 112280476 | ATG3  | ENST00000283290.5.uORF_CT G.7                                                          | UTR only   | 0.00087758 |
| ENST00000371120.3.uORF_ATT 3   | 9.626010702 | ATT | chr1  | + | 63269450  | 63269455  | ATG4C | ENST00000317868.4.uORF_ATT.4,ENST00000443289.1.uORF_ATT.2,ENST00000371118.1.uORF_ATT.2 | UTR only   | 3.78E-06   |
| ENST00000540647.1.uORF_CT G.1  | 9.574717824 | CTG | chr12 | + | 132402887 | 132402922 | ULK1  | -                                                                                      | UTR only   | 0.00070728 |
| ENST00000402314.2.uORF_GT G.8  | 9.424063908 | GTG | chr3  | - | 112280496 | 112280476 | ATG3  | ENST00000496423.1.uORF_GT G.1,ENST00000283290.5.uORF_GT G.12                           | UTR only   | 0.00028977 |
| ENST00000540647.1.uORF_ATT 1   | 9.400306112 | ATT | chr12 | + | 132402911 | 132402922 | ULK1  | -                                                                                      | UTR only   | 0.00010328 |
| ENST00000435510.2.uORF_CT G.2  | 9.394652399 | CTG | chr10 | + | 64893147  | 64911930  | NRBF2 | -                                                                                      | CDSpartial | 0.00198221 |
| ENST00000458350.3.uORF_AC G.1  | 9.29932563  | ACG | chr5  | + | 81267914  | 81272036  | ATG10 | -                                                                                      | UTR only   | 0.00028977 |
| ENST00000526508.1.uORF_CT G.7  | 9.164376538 | CTG | chr11 | + | 46639331  | 46639813  | ATG13 | ENST00000581438.1.uORF_CT G.7,ENST00000533325.1.uORF_CT G.7                            | UTR only   | 0.00087758 |
| ENST00000531818.1.uORF_ATT 1   | 9.09505404  | ATT | chr11 | + | 75690616  | 75690681  | UVRAG | -                                                                                      | UTR only   | 0.00010328 |
| ENST00000526508.1.uORF_CT G.4  | 8.942746117 | CTG | chr11 | + | 46639268  | 46639813  | ATG13 | ENST00000581438.1.uORF_CT G.4,ENST00000533325.1.uORF_CT G.4                            | UTR only   | 0.00087758 |
| ENST00000526508.1.uORF_AT C.1  | 8.930483394 | ATC | chr11 | + | 46639311  | 46639826  | ATG13 | ENST00000581438.1.uORF_AT C.1,ENST00000533325.1.uORF_AT C.1                            | UTR only   | 0.00087758 |
| ENST00000540647.1.uORF_TTG 1   | 8.869673089 | TTG | chr12 | + | 132402866 | 132402922 | ULK1  | -                                                                                      | UTR only   | 0.00031291 |
| ENST00000531818.1.uORF_AT G.2  | 8.852915943 | ATG | chr11 | + | 75690894  | 75690962  | UVRAG | -                                                                                      | UTR only   | 0.8038648  |
| ENST00000402314.2.uORF_GT G.9  | 8.833508047 | GTG | chr3  | - | 112280482 | 112280444 | ATG3  | ENST00000496423.1.uORF_GT G.2,ENST00000283290.5.uORF_GT G.13                           | UTR only   | 0.00070728 |
| ENST00000531818.1.uORF_GT G.10 | 8.830557171 | GTG | chr11 | + | 75690834  | 75690962  | UVRAG | -                                                                                      | UTR only   | 0.00087758 |
| ENST00000343245.3.uORF_AT G.1  | 8.794436811 | ATG | chr6  | - | 106773277 | 106773152 | ATG5  | -                                                                                      | UTR only   | 0.00087758 |
| ENST00000540647.1.uORF_CT G.2  | 8.786168058 | CTG | chr12 | + | 132402890 | 132402922 | ULK1  | -                                                                                      | UTR only   | 0.00070728 |
| ENST00000402314.2.uORF_ATT 1   | 8.781930199 | ATT | chr3  | - | 112280452 | 112280444 | ATG3  | ENST00000496423.1.uORF_ATT.1,ENST00000283290.5.uORF_ATT.1                              | UTR only   | 3.78E-06   |
| ENST00000458350.3.uORF_GT G.1  | 8.742723706 | GTG | chr5  | + | 81268019  | 81272036  | ATG10 | -                                                                                      | UTR only   | 0.00028977 |
| ENST00000458350.3.uORF_ATT 1   | 8.710802554 | ATT | chr5  | + | 81267989  | 81272036  | ATG10 | -                                                                                      | UTR only   | 0.00028977 |
| ENST00000458350.3.uORF_CT G.6  | 8.647451663 | CTG | chr5  | + | 81267944  | 81272036  | ATG10 | -                                                                                      | UTR only   | 0.00031291 |

|                               |             |     |       |   |           |           |                  |                                                                                           |            |            |
|-------------------------------|-------------|-----|-------|---|-----------|-----------|------------------|-------------------------------------------------------------------------------------------|------------|------------|
| ENST00000531818.1.uORF_GT G.6 | 8.604031161 | GTG | chr11 | + | 75690785  | 75690799  | <i>UVRAG</i>     | -                                                                                         | UTR only   | 0.00028977 |
| ENST00000343245.3.uORF_GT G.3 | 8.5851955   | GTG | chr6  | - | 106773246 | 106764127 | <i>ATG5</i>      | -                                                                                         | UTR only   | 0.00011838 |
| ENST00000317868.4.uORF_AC G.1 | 8.571783477 | ACG | chr1  | + | 63249835  | 63269480  | <i>ATG4C</i>     | ENST00000371120.3.uORF_AC G.1                                                             | CDSpartial | 0.00087758 |
| ENST00000571129.1.uORF_AT G.1 | 8.521658613 | ATG | chr17 | - | 7145411   | 7144995   | <i>GABARAP</i>   | -                                                                                         | UTR only   | 0.00081058 |
| ENST00000282185.3.uORF_GT G.2 | 8.479504557 | GTG | chr5  | + | 81267867  | 81267905  | <i>ATG10</i>     | ENST00000355178.4.uORF_GT G.2,ENST00000510085.1.uORF_GT G.2                               | UTR only   | 0.00028977 |
| ENST00000531818.1.uORF_TTG .1 | 8.441636331 | TTG | chr11 | + | 75690592  | 75690681  | <i>UVRAG</i>     | -                                                                                         | UTR only   | 0.00031291 |
| ENST00000531818.1.uORF_AT G.1 | 8.43097077  | ATG | chr11 | + | 75690745  | 75690783  | <i>UVRAG</i>     | -                                                                                         | UTR only   | 0.00081058 |
| ENST00000398870.3.uORF_AC G.1 | 8.353656771 | ACG | chr18 | + | 39535249  | 39542470  | <i>PIK3C3</i>    | -                                                                                         | CDSpartial | 0.00012783 |
| ENST00000531818.1.uORF_GT G.1 | 8.35264928  | GTG | chr11 | + | 75690620  | 75690799  | <i>UVRAG</i>     | -                                                                                         | UTR only   | 0.00010328 |
| ENST00000526508.1.uORF_GT G.8 | 8.347060256 | GTG | chr11 | + | 46639810  | 46639830  | <i>ATG13</i>     | ENST00000581438.1.uORF_GT G.8,ENST00000395549.3.uORF_GT G.2,ENST00000533325.1.uORF_GT G.8 | UTR only   | 0.00028977 |
| ENST00000531818.1.uORF_AT G.3 | 8.31253336  | ATG | chr11 | + | 75690959  | 75694444  | <i>UVRAG</i>     | -                                                                                         | UTR only   | 0.00035863 |
| ENST00000398870.3.uORF_GT G.2 | 8.268650818 | GTG | chr18 | + | 39535252  | 39542470  | <i>PIK3C3</i>    | -                                                                                         | CDSpartial | 0.00012783 |
| ENST00000458350.3.uORF_CT G.7 | 8.226131057 | CTG | chr5  | + | 81268035  | 81272067  | <i>ATG10</i>     | -                                                                                         | UTR only   | 0.00087758 |
| ENST00000343245.3.uORF_GT G.2 | 8.224400312 | GTG | chr6  | - | 106773264 | 106764127 | <i>ATG5</i>      | -                                                                                         | UTR only   | 0.00011838 |
| ENST00000317868.4.uORF_CT G.5 | 8.212327032 | CTG | chr1  | + | 63249854  | 63269406  | <i>ATG4C</i>     | ENST00000371120.3.uORF_CT G.5                                                             | UTR only   | 0.00012783 |
| ENST00000571129.1.uORF_GT G.3 | 8.184141293 | GTG | chr17 | - | 7145402   | 7144995   | <i>GABARAP</i>   | -                                                                                         | UTR only   | 1.06E-05   |
| ENST00000374837.3.uORF_AT G.2 | 8.175445733 | ATG | chr20 | + | 33137715  | 33137756  | <i>MAP1LC3 A</i> | -                                                                                         | UTR only   | 0.00198221 |
| ENST00000531818.1.uORF_ATT .3 | 8.156474184 | ATT | chr11 | + | 75690799  | 75690957  | <i>UVRAG</i>     | -                                                                                         | UTR only   | 0.00011838 |
| ENST00000531818.1.uORF_GT G.7 | 8.128025199 | GTG | chr11 | + | 75690791  | 75690799  | <i>UVRAG</i>     | -                                                                                         | UTR only   | 1.06E-05   |
| ENST00000398870.3.uORF_GT G.1 | 8.123800141 | GTG | chr18 | + | 39535234  | 39542470  | <i>PIK3C3</i>    | -                                                                                         | CDSpartial | 0.00012783 |
| ENST00000458350.3.uORF_AT C.1 | 8.110051166 | ATC | chr5  | + | 81267986  | 81272036  | <i>ATG10</i>     | -                                                                                         | UTR only   | 0.00010328 |

|                                           |             |     |       |   |           |           |                |                                                                                                    |            |            |
|-------------------------------------------|-------------|-----|-------|---|-----------|-----------|----------------|----------------------------------------------------------------------------------------------------|------------|------------|
| ENST0000<br>0526508.1.<br>uORF_TTG<br>.2  | 8.109006268 | TTG | chr11 | + | 46639823  | 46666901  | <i>ATG13</i>   | -                                                                                                  | CDSpartial | 0.00012783 |
| ENST0000<br>0571129.1.<br>uORF_TTG<br>.1  | 8.079194398 | TTG | chr17 | - | 7145450   | 7144995   | <i>GABARAP</i> | -                                                                                                  | UTR only   | 0.00081058 |
| ENST0000<br>0526508.1.<br>uORF_GT<br>G.9  | 8.071286882 | GTG | chr11 | + | 46639816  | 46639830  | <i>ATG13</i>   | ENST00000581438.1.uORF<br>_GTG.9.ENST00000395549<br>.3.uORF_GTG.3.ENST0000<br>0533325.1.uORF_GTG.9 | UTR only   | 0.00028977 |
| ENST0000<br>0540647.1.<br>uORF_GT<br>G.3  | 8.06387307  | GTG | chr12 | + | 132402855 | 132402869 | <i>ULK1</i>    | -                                                                                                  | UTR only   | 0.00028977 |
| ENST0000<br>0531818.1.<br>uORF_GT<br>G.8  | 8.048130237 | GTG | chr11 | + | 75690808  | 75690957  | <i>UVRAG</i>   | -                                                                                                  | UTR only   | 0.00011838 |
| ENST0000<br>0526508.1.<br>uORF_CT<br>G.11 | 8.021653968 | CTG | chr11 | + | 46639868  | 46666901  | <i>ATG13</i>   | -                                                                                                  | CDSpartial | 0.00012783 |
| ENST0000<br>0531818.1.<br>uORF_CT<br>G.1  | 7.974995247 | CTG | chr11 | + | 75690582  | 75690662  | <i>UVRAG</i>   | -                                                                                                  | UTR only   | 0.00035863 |
| ENST0000<br>0526508.1.<br>uORF_GT<br>G.11 | 7.96868827  | GTG | chr11 | + | 46639874  | 46666901  | <i>ATG13</i>   | -                                                                                                  | CDSpartial | 4.22E-05   |
| ENST0000<br>0317868.4.<br>uORF_AT<br>C.1  | 7.964900944 | ATC | chr1  | + | 63269425  | 63269433  | <i>ATG4C</i>   | ENST00000371120.3.uORF<br>_ATC.1.ENST00000371118<br>.1.uORF_ATC.1                                  | UTR only   | 1.55E-06   |
| ENST0000<br>0540647.1.<br>uORF_GT<br>G.6  | 7.96368611  | GTG | chr12 | + | 132402926 | 132402931 | <i>ULK1</i>    | -                                                                                                  | UTR only   | 1.06E-05   |
| ENST0000<br>0282185.3.<br>uORF_CT<br>G.6  | 7.937141293 | CTG | chr5  | + | 81267944  | 81283468  | <i>ATG10</i>   | ENST00000355178.4.uORF<br>_CTG.6                                                                   | CDSpartial | 0.00012783 |
| ENST0000<br>0531818.1.<br>uORF_GT<br>G.11 | 7.92534846  | GTG | chr11 | + | 75690875  | 75690889  | <i>UVRAG</i>   | -                                                                                                  | UTR only   | 0.00028977 |
| ENST0000<br>0025008.5.<br>uORF_GT<br>G.6  | 7.922465782 | GTG | chr8  | - | 53599422  | 53598055  | <i>RB1CC1</i>  | ENST00000435644.2.uORF<br>_GTG.6.ENST00000518468<br>.1.uORF_GTG.5                                  | UTR only   | 0.00028977 |
| ENST0000<br>0317868.4.<br>uORF_TTG<br>.1  | 7.918468377 | TTG | chr1  | + | 63249860  | 63269406  | <i>ATG4C</i>   | ENST00000371120.3.uORF<br>_TTG.1                                                                   | UTR only   | 0.00012783 |
| ENST0000<br>0540647.1.<br>uORF_AT<br>A.1  | 7.914362681 | ATA | chr12 | + | 132402917 | 132402922 | <i>ULK1</i>    | -                                                                                                  | UTR only   | 3.78E-06   |
| ENST0000<br>0398870.3.<br>uORF_TTG<br>.1  | 7.910519807 | TTG | chr18 | + | 39535243  | 39542470  | <i>PIK3C3</i>  | -                                                                                                  | CDSpartial | 0.00028901 |
| ENST0000<br>0531818.1.<br>uORF_AC<br>G.1  | 7.906285726 | ACG | chr11 | + | 75690916  | 75690957  | <i>UVRAG</i>   | -                                                                                                  | UTR only   | 0.00011838 |
| ENST0000<br>0531818.1.<br>uORF_TTG<br>.7  | 7.904225497 | TTG | chr11 | + | 75690844  | 75690957  | <i>UVRAG</i>   | -                                                                                                  | UTR only   | 0.00035863 |
| ENST0000<br>0531818.1.<br>uORF_CT<br>G.9  | 7.899506216 | CTG | chr11 | + | 75690796  | 75690957  | <i>UVRAG</i>   | -                                                                                                  | UTR only   | 0.00035863 |
| ENST0000<br>0531818.1.<br>uORF_TTG<br>.2  | 7.894295023 | TTG | chr11 | + | 75690617  | 75690799  | <i>UVRAG</i>   | -                                                                                                  | UTR only   | 0.00031291 |
| ENST0000<br>0540647.1.<br>uORF_GT<br>G.1  | 7.868460005 | GTG | chr12 | + | 132402848 | 132402922 | <i>ULK1</i>    | -                                                                                                  | UTR only   | 4.22E-05   |

|                               |             |     |       |   |           |           |         |                                                                                        |            |            |
|-------------------------------|-------------|-----|-------|---|-----------|-----------|---------|----------------------------------------------------------------------------------------|------------|------------|
| ENST00000343245.3.uORF_TTG.1  | 7.855700932 | TTG | chr6  | - | 106773240 | 106764127 | ATG5    | -                                                                                      | UTR only   | 0.00035863 |
| ENST00000571129.1.uORF_CT.G.5 | 7.851653359 | CTG | chr17 | - | 7145432   | 7144995   | GABARAP | -                                                                                      | UTR only   | 0.00081058 |
| ENST00000025008.5.uORF_ATT.2  | 7.836425815 | ATT | chr8  | - | 53598045  | 53598004  | RB1CC1  | ENST00000435644.2.uORF_ATT.2,ENST00000518468.1.uORF_ATT.9                              | CDSpartial | 0.00010328 |
| ENST00000531818.1.uORF_AT.G.4 | 7.790700575 | ATG | chr11 | + | 75690983  | 75694444  | UVRAG   | -                                                                                      | UTR only   | 0.00035863 |
| ENST00000531818.1.uORF_ATT.4  | 7.786854074 | ATT | chr11 | + | 75690813  | 75690962  | UVRAG   | -                                                                                      | UTR only   | 0.00087758 |
| ENST00000531818.1.uORF_CT.G.4 | 7.781819844 | CTG | chr11 | + | 75690670  | 75690681  | UVRAG   | -                                                                                      | UTR only   | 0.00198221 |
| ENST00000317868.4.uORF_GT.G.1 | 7.774069044 | GTG | chr1  | + | 63249843  | 63249878  | ATG4C   | ENST00000371120.3.uORF_GTG.1,ENST00000443289.1.uORF_GTG.1                              | UTR only   | 0.00028977 |
| ENST00000282185.3.uORF_TTG.1  | 7.76686727  | TTG | chr5  | + | 81267928  | 81268002  | ATG10   | ENST00000355178.4.uORF_TTG.1,ENST00000458350.3.uORF_TTG.1,ENST00000510085.1.uORF_TTG.1 | UTR only   | 0.00087758 |
| ENST00000531818.1.uORF_GT.G.9 | 7.755309361 | GTG | chr11 | + | 75690822  | 75690962  | UVRAG   | -                                                                                      | UTR only   | 0.00087758 |
| ENST00000317868.4.uORF_CT.G.4 | 7.723154055 | CTG | chr1  | + | 63249839  | 63269406  | ATG4C   | ENST00000371120.3.uORF_CTG.4                                                           | UTR only   | 0.00012783 |
| ENST00000317868.4.uORF_TTG.3  | 7.706594414 | TTG | chr1  | + | 63249898  | 63269480  | ATG4C   | -                                                                                      | CDSpartial | 0.00087758 |
| ENST00000571129.1.uORF_GT.G.1 | 7.703887934 | GTG | chr17 | - | 7145459   | 7144995   | GABARAP | -                                                                                      | UTR only   | 0.00035863 |
| ENST00000526508.1.uORF_CT.G.9 | 7.639935091 | CTG | chr11 | + | 46639820  | 46666901  | ATG13   | -                                                                                      | CDSpartial | 0.00012783 |
| ENST00000531818.1.uORF_TTG.3  | 7.61835691  | TTG | chr11 | + | 75690652  | 75690681  | UVRAG   | -                                                                                      | UTR only   | 0.00198221 |
| ENST00000458350.3.uORF_CT.G.3 | 7.579706972 | CTG | chr5  | + | 81267898  | 81268002  | ATG10   | ENST00000355178.4.uORF_CTG.3,ENST00000510085.1.uORF_CTG.3,ENST00000282185.3.uORF_CTG.3 | UTR only   | 0.00087758 |
| ENST00000317868.4.uORF_GT.G.4 | 7.570047245 | GTG | chr1  | + | 63249862  | 63269480  | ATG4C   | ENST00000371120.3.uORF_GTG.4                                                           | CDSpartial | 0.00087758 |
| ENST00000458350.3.uORF_CT.G.5 | 7.561409197 | CTG | chr5  | + | 81267924  | 81272067  | ATG10   | -                                                                                      | UTR only   | 0.00087758 |
| ENST00000526508.1.uORF_GT.G.7 | 7.558651101 | GTG | chr11 | + | 46639424  | 46639813  | ATG13   | ENST00000533325.1.uORF_GTG.7,ENST00000581438.1.uORF_GTG.7,ENST00000395549.3.uORF_GTG.1 | UTR only   | 0.00028977 |
| ENST00000372254.3.uORF_AT.C.1 | 7.555895923 | ATC | chrX  | + | 107334992 | 107335015 | ATG4A   | ENST00000345734.3.uORF_ATC.1,ENST00000372232.3.uORF_ATC.1                              | UTR only   | 0.00010328 |
| ENST00000531818.1.uORF_AT.C.4 | 7.527125264 | ATC | chr11 | + | 75690994  | 75691029  | UVRAG   | -                                                                                      | UTR only   | 4.22E-05   |
| ENST00000540647.1.uORF_GT.G.2 | 7.484042718 | GTG | chr12 | + | 132402851 | 132402922 | ULK1    | -                                                                                      | UTR only   | 4.22E-05   |

|                                           |             |     |       |   |           |           |                      |                                                                                                                                                                                                                                                                                 |            |            |
|-------------------------------------------|-------------|-----|-------|---|-----------|-----------|----------------------|---------------------------------------------------------------------------------------------------------------------------------------------------------------------------------------------------------------------------------------------------------------------------------|------------|------------|
| ENST0000<br>0531818.1.<br>uORF_GT<br>G.12 | 7.474047758 | GTG | chr11 | + | 75690886  | 75690957  | <i>UVRAG</i>         | -                                                                                                                                                                                                                                                                               | UTR only   | 0.00011838 |
| ENST0000<br>0531818.1.<br>uORF_AT<br>A.2  | 7.473898364 | ATA | chr11 | + | 75690732  | 75690758  | <i>UVRAG</i>         | -                                                                                                                                                                                                                                                                               | UTR only   | 0.00010328 |
| ENST0000<br>0531818.1.<br>uORF_GT<br>G.4  | 7.464836177 | GTG | chr11 | + | 75690698  | 75690799  | <i>UVRAG</i>         | -                                                                                                                                                                                                                                                                               | UTR only   | 4.22E-05   |
| ENST0000<br>0531818.1.<br>uORF_CT<br>G.2  | 7.447890579 | CTG | chr11 | + | 75690600  | 75690662  | <i>UVRAG</i>         | -                                                                                                                                                                                                                                                                               | UTR only   | 0.00035863 |
| ENST0000<br>0458350.3.<br>uORF_AC<br>G.2  | 7.435329228 | ACG | chr5  | + | 81272017  | 81272067  | <i>ATG10</i>         | -                                                                                                                                                                                                                                                                               | UTR only   | 0.00028977 |
| ENST0000<br>0317868.4.<br>uORF_GT<br>G.3  | 7.427029064 | GTG | chr1  | + | 63249847  | 63269480  | <i>ATG4C</i>         | ENST00000371120.3.uORF<br>_GTG.3                                                                                                                                                                                                                                                | CDSpartial | 0.00087758 |
| ENST0000<br>0374837.3.<br>uORF_ATT<br>.1  | 7.426451591 | ATT | chr20 | + | 33134708  | 33137737  | <i>MAPILC3<br/>A</i> | -                                                                                                                                                                                                                                                                               | UTR only   | 0.00010328 |
| ENST0000<br>0347464.5.<br>uORF_CT<br>G.6  | 7.421030439 | CTG | chr2  | + | 234160408 | 234160452 | <i>ATG16L1</i>       | ENST00000373525.5.uORF<br>_CTG.4,ENST00000392018<br>.1.uORF_CTG.3,ENST0000<br>0444735.1.uORF_CTG.4,E<br>NST00000392021.3.uORF_<br>CTG.4,ENST00000392020.<br>4.uORF_CTG.3,ENST0000<br>0419681.1.uORF_CTG.4,E<br>NST00000392017.4.uORF_<br>CTG.6,ENST00000417017.<br>1.uORF_CTG.3 | UTR only   | 0.00198221 |
| ENST0000<br>0374837.3.<br>uORF_CT<br>G.6  | 7.37174649  | CTG | chr20 | + | 33137759  | 33137785  | <i>MAPILC3<br/>A</i> | -                                                                                                                                                                                                                                                                               | CDSpartial | 0.00198221 |
| ENST0000<br>0571129.1.<br>uORF_GT<br>G.2  | 7.355279364 | GTG | chr17 | - | 7145456   | 7144995   | <i>GABARAP</i>       | -                                                                                                                                                                                                                                                                               | UTR only   | 0.00035863 |
| ENST0000<br>0458350.3.<br>uORF_CT<br>G.8  | 7.351664317 | CTG | chr5  | + | 81268064  | 81272036  | <i>ATG10</i>         | -                                                                                                                                                                                                                                                                               | UTR only   | 0.00087758 |
| ENST0000<br>0458350.3.<br>uORF_CT<br>G.9  | 7.348431878 | CTG | chr5  | + | 81268092  | 81272067  | <i>ATG10</i>         | -                                                                                                                                                                                                                                                                               | UTR only   | 0.00087758 |
| ENST0000<br>0531818.1.<br>uORF_CT<br>G.11 | 7.342471519 | CTG | chr11 | + | 75690848  | 75690889  | <i>UVRAG</i>         | -                                                                                                                                                                                                                                                                               | UTR only   | 0.00081058 |
| ENST0000<br>0374837.3.<br>uORF_TTG<br>.1  | 7.336105572 | TTG | chr20 | + | 33134711  | 33137737  | <i>MAPILC3<br/>A</i> | -                                                                                                                                                                                                                                                                               | UTR only   | 0.00198221 |
| ENST0000<br>0571129.1.<br>uORF_CT<br>G.6  | 7.299396488 | CTG | chr17 | - | 7145429   | 7144995   | <i>GABARAP</i>       | -                                                                                                                                                                                                                                                                               | UTR only   | 0.00081058 |
| ENST0000<br>0531818.1.<br>uORF_CT<br>G.5  | 7.277973621 | CTG | chr11 | + | 75690673  | 75690681  | <i>UVRAG</i>         | -                                                                                                                                                                                                                                                                               | UTR only   | 7.28E-05   |
| ENST0000<br>0531818.1.<br>uORF_GT<br>G.2  | 7.272289444 | GTG | chr11 | + | 75690675  | 75690758  | <i>UVRAG</i>         | -                                                                                                                                                                                                                                                                               | UTR only   | 4.22E-05   |
| ENST0000<br>0317868.4.<br>uORF_GT<br>G.2  | 7.267764821 | GTG | chr1  | + | 63249845  | 63269406  | <i>ATG4C</i>         | ENST00000371120.3.uORF<br>_GTG.2                                                                                                                                                                                                                                                | UTR only   | 4.22E-05   |
| ENST0000<br>0317868.4.<br>uORF_GT<br>G.5  | 7.249578773 | GTG | chr1  | + | 63249901  | 63269480  | <i>ATG4C</i>         | -                                                                                                                                                                                                                                                                               | CDSpartial | 0.00087758 |
| ENST0000<br>0531818.1.                    | 7.248990161 | CTG | chr11 | + | 75690829  | 75690957  | <i>UVRAG</i>         | -                                                                                                                                                                                                                                                                               | UTR only   | 0.00035863 |

|                                           |             |     |       |   |           |           |                      |                                                                                                                                                                                                                                                                                        |          |            |
|-------------------------------------------|-------------|-----|-------|---|-----------|-----------|----------------------|----------------------------------------------------------------------------------------------------------------------------------------------------------------------------------------------------------------------------------------------------------------------------------------|----------|------------|
| uORF_CT<br>G.10                           |             |     |       |   |           |           |                      |                                                                                                                                                                                                                                                                                        |          |            |
| ENST0000<br>0531818.1.<br>uORF_GT<br>G.3  | 7.236511569 | GTG | chr11 | + | 75690684  | 75690758  | <i>UVRAG</i>         | -                                                                                                                                                                                                                                                                                      | UTR only | 4.22E-05   |
| ENST0000<br>0531818.1.<br>uORF_ATT<br>2   | 7.236471746 | ATT | chr11 | + | 75690779  | 75690799  | <i>UVRAG</i>         | -                                                                                                                                                                                                                                                                                      | UTR only | 0.00010328 |
| ENST0000<br>0571129.1.<br>uORF_TTG<br>2   | 7.227393269 | TTG | chr17 | - | 7145423   | 7144995   | <i>GABARAP</i>       | -                                                                                                                                                                                                                                                                                      | UTR only | 0.00081058 |
| ENST0000<br>0531818.1.<br>uORF_AT<br>C.1  | 7.224354133 | ATC | chr11 | + | 75690662  | 75690799  | <i>UVRAG</i>         | -                                                                                                                                                                                                                                                                                      | UTR only | 0.00010328 |
| ENST0000<br>0531818.1.<br>uORF_TTG<br>.10 | 7.190711178 | TTG | chr11 | + | 75690909  | 75690962  | <i>UVRAG</i>         | -                                                                                                                                                                                                                                                                                      | UTR only | 0.9026072  |
| ENST0000<br>0317868.4.<br>uORF_TTG<br>2   | 7.184997473 | TTG | chr1  | + | 63249890  | 63269406  | <i>ATG4C</i>         | ENST00000371120.3.uORF<br>_TTG.2                                                                                                                                                                                                                                                       | UTR only | 0.00012783 |
| ENST0000<br>0531818.1.<br>uORF_TTG<br>9   | 7.150989006 | TTG | chr11 | + | 75690899  | 75694444  | <i>UVRAG</i>         | -                                                                                                                                                                                                                                                                                      | UTR only | 0.00035863 |
| ENST0000<br>0282185.3.<br>uORF_CT<br>G.5  | 7.144898413 | CTG | chr5  | + | 81267924  | 81283388  | <i>ATG10</i>         | ENST00000510085.1.uORF<br>_CTG.5.ENST00000355178<br>.4.uORF_CTG.5                                                                                                                                                                                                                      | UTR only | 0.00031291 |
| ENST0000<br>0571129.1.<br>uORF_CT<br>G.4  | 7.1223086   | CTG | chr17 | - | 7145438   | 7144995   | <i>GABARAP</i>       | -                                                                                                                                                                                                                                                                                      | UTR only | 0.00081058 |
| ENST0000<br>0531818.1.<br>uORF_TTG<br>.4  | 7.117376984 | TTG | chr11 | + | 75690659  | 75690799  | <i>UVRAG</i>         | -                                                                                                                                                                                                                                                                                      | UTR only | 0.00031291 |
| ENST0000<br>0531818.1.<br>uORF_GT<br>G.5  | 7.11585323  | GTG | chr11 | + | 75690704  | 75690799  | <i>UVRAG</i>         | -                                                                                                                                                                                                                                                                                      | UTR only | 4.22E-05   |
| ENST0000<br>0458350.3.<br>uORF_CT<br>G.4  | 7.102183056 | CTG | chr5  | + | 81267902  | 81272036  | <i>ATG10</i>         | -                                                                                                                                                                                                                                                                                      | UTR only | 0.00087758 |
| ENST0000<br>0343245.3.<br>uORF_CT<br>G.1  | 7.095317151 | CTG | chr6  | - | 106773216 | 106764127 | <i>ATG5</i>          | -                                                                                                                                                                                                                                                                                      | UTR only | 0.00035863 |
| ENST0000<br>0374837.3.<br>uORF_AT<br>G.1  | 7.093107583 | ATG | chr20 | + | 33134682  | 33134714  | <i>MAP1LC3<br/>A</i> | -                                                                                                                                                                                                                                                                                      | UTR only | 0.00081058 |
| ENST0000<br>0343245.3.<br>uORF_GT<br>G.1  | 7.089190694 | GTG | chr6  | - | 106773270 | 106764127 | <i>ATG5</i>          | -                                                                                                                                                                                                                                                                                      | UTR only | 0.00011838 |
| ENST0000<br>0343245.3.<br>uORF_AC<br>G.1  | 7.082191667 | ACG | chr6  | - | 106773232 | 106773152 | <i>ATG5</i>          | -                                                                                                                                                                                                                                                                                      | UTR only | 0.00087758 |
| ENST0000<br>0526508.1.<br>uORF_CT<br>G.13 | 7.054621383 | CTG | chr11 | + | 46639894  | 46639899  | <i>ATG13</i>         | ENST00000581416.1.uORF<br>_CTG.10.ENST0000058143<br>8.1.uORF_CTG.13.ENST00<br>000529655.1.uORF_CTG.1<br>0.ENST00000577256.1.uO<br>RF_CTG.10.ENST0000039<br>5549.3.uORF_CTG.6.ENST<br>00000580238.1.uORF_CTG<br>.10.ENST00000533325.1.u<br>ORF_CTG.13.ENST000005<br>82547.1.uORF_CTG.10 | UTR only | 7.28E-05   |
| ENST0000<br>0458350.3.<br>uORF_GT<br>G.2  | 7.041331409 | GTG | chr5  | + | 81272030  | 81272059  | <i>ATG10</i>         | -                                                                                                                                                                                                                                                                                      | UTR only | 0.00028901 |
| ENST0000<br>0343245.3.<br>uORF_GT<br>G.5  | 7.040187594 | GTG | chr6  | - | 106773197 | 106764114 | <i>ATG5</i>          | -                                                                                                                                                                                                                                                                                      | UTR only | 0.00010328 |

|                                |             |     |       |   |          |          |                 |                                                                                          |            |            |
|--------------------------------|-------------|-----|-------|---|----------|----------|-----------------|------------------------------------------------------------------------------------------|------------|------------|
| ENST00000531818.1.uORF_TTG.8   | 6.97966565  | TTG | chr11 | + | 75690873 | 75690962 | <i>UVRAG</i>    | -                                                                                        | UTR only   | 0.00198221 |
| ENST00000531818.1.uORF_CT.G.12 | 6.949331025 | CTG | chr11 | + | 75690883 | 75690957 | <i>UVRAG</i>    | -                                                                                        | UTR only   | 0.00035863 |
| ENST00000317868.4.uORF_ATT.1   | 6.939286219 | ATT | chr1  | + | 63249888 | 63269398 | <i>ATG4C</i>    | ENST00000371120.3.uORF_ATT.1                                                             | UTR only   | 0.00010328 |
| ENST00000531818.1.uORF_GT.G.13 | 6.91503502  | GTG | chr11 | + | 75690923 | 75694444 | <i>UVRAG</i>    | -                                                                                        | UTR only   | 0.00035863 |
| ENST00000526508.1.uORF_CT.G.10 | 6.901495526 | CTG | chr11 | + | 46639857 | 46639913 | <i>ATG13</i>    | ENST00000395549.3.uORF_CTG.3,ENST00000581438.1.uORF_CTG.10,ENST00000533325.1.uORF_CTG.10 | UTR only   | 0.00012783 |
| ENST00000531818.1.uORF_ATT.5   | 6.897448952 | ATT | chr11 | + | 75690976 | 75691029 | <i>UVRAG</i>    | -                                                                                        | UTR only   | 4.22E-05   |
| ENST00000526508.1.uORF_AC.G.6  | 6.88664209  | ACG | chr11 | + | 46639853 | 46666901 | <i>ATG13</i>    | -                                                                                        | CDSpartial | 4.22E-05   |
| ENST00000571129.1.uORF_CT.G.1  | 6.886119585 | CTG | chr17 | - | 7145468  | 7144995  | <i>GABARAP</i>  | -                                                                                        | UTR only   | 0.00081058 |
| ENST00000571129.1.uORF_CT.G.2  | 6.877621845 | CTG | chr17 | - | 7145465  | 7144995  | <i>GABARAP</i>  | -                                                                                        | UTR only   | 0.00081058 |
| ENST00000317868.4.uORF_CT.G.6  | 6.875109005 | CTG | chr1  | + | 63249869 | 63269406 | <i>ATG4C</i>    | ENST00000371120.3.uORF_CTG.6                                                             | UTR only   | 0.00012783 |
| ENST00000531818.1.uORF_AT.C.2  | 6.872857009 | ATC | chr11 | + | 75690735 | 75690758 | <i>UVRAG</i>    | -                                                                                        | UTR only   | 0.00010328 |
| ENST00000531818.1.uORF_TTG.6   | 6.869270668 | TTG | chr11 | + | 75690764 | 75690799 | <i>UVRAG</i>    | -                                                                                        | UTR only   | 0.00028901 |
| ENST00000025008.5.uORF_CT.G.13 | 6.860225918 | CTG | chr8  | - | 53599418 | 53598078 | <i>RB1CC1</i>   | ENST00000435644.2.uORF_CTG.13,ENST00000518468.1.uORF_CTG.7                               | UTR only   | 7.28E-05   |
| ENST00000374837.3.uORF_GT.G.1  | 6.84388263  | GTG | chr20 | + | 33134693 | 33137737 | <i>MAP1LC3A</i> | -                                                                                        | UTR only   | 0.00010328 |
| ENST00000458350.3.uORF_GT.G.3  | 6.804676225 | GTG | chr5  | + | 81272064 | 81272111 | <i>ATG10</i>    | -                                                                                        | UTR only   | 4.22E-05   |
| ENST00000531818.1.uORF_CT.G.13 | 6.795454074 | CTG | chr11 | + | 75690904 | 75690957 | <i>UVRAG</i>    | -                                                                                        | UTR only   | 0.00081058 |
| ENST00000531818.1.uORF_TTG.11  | 6.781201691 | TTG | chr11 | + | 75690977 | 75694444 | <i>UVRAG</i>    | -                                                                                        | UTR only   | 0.00035863 |
| ENST00000025008.5.uORF_AT.A.4  | 6.778393709 | ATA | chr8  | - | 53598039 | 53598004 | <i>RB1CC1</i>   | ENST00000435644.2.uORF_AT.A.3,ENST00000518468.1.uORF_AT.A.6                              | CDSpartial | 0.00010328 |
| ENST00000531818.1.uORF_AT.C.3  | 6.742890662 | ATC | chr11 | + | 75690991 | 75691029 | <i>UVRAG</i>    | -                                                                                        | UTR only   | 4.22E-05   |
| ENST00000317868.4.uORF_CT.G.7  | 6.723732389 | CTG | chr1  | + | 63249872 | 63269406 | <i>ATG4C</i>    | ENST00000371120.3.uORF_CTG.7                                                             | UTR only   | 0.00012783 |
| ENST00000531818.1.uORF_GT.G.14 | 6.696811646 | GTG | chr11 | + | 75690954 | 75690962 | <i>UVRAG</i>    | -                                                                                        | UTR only   | 1.06E-05   |



|                                |             |     |       |   |           |           |           |                                                                                                                                                                                                                                                 |            |            |
|--------------------------------|-------------|-----|-------|---|-----------|-----------|-----------|-------------------------------------------------------------------------------------------------------------------------------------------------------------------------------------------------------------------------------------------------|------------|------------|
| ENST00000282185.3.uORF_CT G.4  | 6.689767626 | CTG | chr5  | + | 81267902  | 81283468  | ATG10     | ENST00000355178.4.uORF_CT G.4                                                                                                                                                                                                                   | CDSpartial | 0.00012783 |
| ENST00000531818.1.uORF_AT C.5  | 6.655906313 | ATC | chr11 | + | 75690998  | 75694444  | UVRAG     | -                                                                                                                                                                                                                                               | UTR only   | 4.22E-05   |
| ENST00000531818.1.uORF_ATT .6  | 6.638654134 | ATT | chr11 | + | 75691039  | 75694431  | UVRAG     | -                                                                                                                                                                                                                                               | UTR only   | 0.00010328 |
| ENST00000531818.1.uORF_CT G.19 | 6.637189785 | CTG | chr11 | + | 75691031  | 75694444  | UVRAG     | -                                                                                                                                                                                                                                               | UTR only   | 0.00035863 |
| ENST00000458350.3.uORF_CT G.10 | 6.610449444 | CTG | chr5  | + | 81268097  | 81272036  | ATG10     | -                                                                                                                                                                                                                                               | UTR only   | 0.00198221 |
| ENST00000374837.3.uORF_TTG .2  | 6.566019292 | TTG | chr20 | + | 33137727  | 33137756  | MAP1LC3 A | -                                                                                                                                                                                                                                               | UTR only   | 0.00198221 |
| ENST00000372254.3.uORF_CT G.1  | 6.535581017 | CTG | chrX  | + | 107334942 | 107334998 | ATG4A     | ENST00000372232.3.uORF_CT G.1,ENST00000345734.3.uORF_CT G.1                                                                                                                                                                                     | UTR only   | 0.00035863 |
| ENST00000458350.3.uORF_CT G.11 | 6.531288387 | CTG | chr5  | + | 81272056  | 81272067  | ATG10     | -                                                                                                                                                                                                                                               | UTR only   | 0.00198221 |
| ENST00000571129.1.uORF_AT C.1  | 6.502554121 | ATC | chr17 | - | 7145474   | 7144995   | GABARAP   | -                                                                                                                                                                                                                                               | UTR only   | 0.00012783 |
| ENST00000343245.3.uORF_CT G.6  | 6.496129808 | CTG | chr6  | - | 106764091 | 106764080 | ATG5      | ENST00000369070.1.uORF_CT G.10,ENST00000360666.4.uORF_CT G.5,ENST00000369076.3.uORF_CT G.10                                                                                                                                                     | CDSpartial | 0.00198221 |
| ENST00000458350.3.uORF_AT C.3  | 6.49398246  | ATC | chr5  | + | 81272067  | 81272111  | ATG10     | -                                                                                                                                                                                                                                               | UTR only   | 4.22E-05   |
| ENST00000531818.1.uORF_CT G.3  | 6.476975923 | CTG | chr11 | + | 75690644  | 75690799  | UVRAG     | -                                                                                                                                                                                                                                               | UTR only   | 0.00031291 |
| ENST00000374837.3.uORF_CT G.7  | 6.445196579 | CTG | chr20 | + | 33137765  | 33137785  | MAP1LC3 A | -                                                                                                                                                                                                                                               | CDSpartial | 0.00198221 |
| ENST00000282185.3.uORF_CT G.2  | 6.431748422 | CTG | chr5  | + | 81267880  | 81268002  | ATG10     | ENST00000355178.4.uORF_CT G.2,ENST00000510085.1.uORF_CT G.2,ENST00000458350.3.uORF_CT G.2                                                                                                                                                       | UTR only   | 0.00035863 |
| ENST00000372232.3.uORF_GT G.1  | 6.415243226 | GTG | chrX  | + | 107334969 | 107334998 | ATG4A     | ENST00000372254.3.uORF_CT G.1,ENST00000345734.3.uORF_CT G.1                                                                                                                                                                                     | UTR only   | 0.00011838 |
| ENST00000458350.3.uORF_CT G.12 | 6.382110946 | CTG | chr5  | + | 81272094  | 81272111  | ATG10     | -                                                                                                                                                                                                                                               | UTR only   | 0.00198221 |
| ENST00000317868.4.uORF_ATT .2  | 6.351562516 | ATT | chr1  | + | 63249914  | 63269406  | ATG4C     | -                                                                                                                                                                                                                                               | UTR only   | 4.22E-05   |
| ENST00000347464.5.uORF_CT G.4  | 6.315416908 | CTG | chr2  | + | 234160391 | 234160537 | ATG16L1   | ENST00000392021.3.uORF_CT G.2,ENST00000392018.1.uORF_CT G.1,ENST00000444735.1.uORF_CT G.2,ENST00000373525.5.uORF_CT G.2,ENST00000419681.1.uORF_CT G.2,ENST00000392020.4.uORF_CT G.1,ENST00000392017.4.uORF_CT G.4,ENST00000417017.1.uORF_CT G.1 | CDSpartial | 0.00087758 |
| ENST00000531818.1.uORF_CT G.7  | 6.271162401 | CTG | chr11 | + | 75690740  | 75690799  | UVRAG     | -                                                                                                                                                                                                                                               | UTR only   | 0.00012783 |

|                                |             |     |       |   |           |           |                  |                                                                                                                                                                                                                                                         |            |            |
|--------------------------------|-------------|-----|-------|---|-----------|-----------|------------------|---------------------------------------------------------------------------------------------------------------------------------------------------------------------------------------------------------------------------------------------------------|------------|------------|
| ENST0000025008.5.uORF_AT C.3   | 6.266613263 | ATC | chr8  | - | 53599458  | 53598055  | <i>RB1CC1</i>    | ENST00000435644.2.uORF_AT C.3.ENST00000518468.1.uORF_AT C.4                                                                                                                                                                                             | UTR only   | 4.22E-05   |
| ENST00000317868.4.uORF_CT G.9  | 6.260701973 | CTG | chr1  | + | 63249908  | 63269406  | <i>ATG4C</i>     | -                                                                                                                                                                                                                                                       | UTR only   | 0.00028901 |
| ENST00000343245.3.uORF_CT G.2  | 6.235275908 | CTG | chr6  | - | 106773192 | 106764127 | <i>ATG5</i>      | -                                                                                                                                                                                                                                                       | UTR only   | 0.00035863 |
| ENST00000317868.4.uORF_CT G.1  | 6.194163836 | CTG | chr1  | + | 63249810  | 63249815  | <i>ATG4C</i>     | ENST00000443289.1.uORF_CT G.1.ENST00000371120.3.uORF_CT G.1                                                                                                                                                                                             | UTR only   | 7.28E-05   |
| ENST00000531818.1.uORF_CT G.15 | 6.18587166  | CTG | chr11 | + | 75690937  | 75690957  | <i>UVRAG</i>     | -                                                                                                                                                                                                                                                       | UTR only   | 0.00081058 |
| ENST00000343245.3.uORF_TTG 2   | 6.185612425 | TTG | chr6  | - | 106773206 | 106764114 | <i>ATG5</i>      | -                                                                                                                                                                                                                                                       | UTR only   | 0.00031291 |
| ENST00000531818.1.uORF_TTG 5   | 6.100901735 | TTG | chr11 | + | 75690752  | 75690799  | <i>UVRAG</i>     | -                                                                                                                                                                                                                                                       | UTR only   | 0.00028901 |
| ENST00000526508.1.uORF_AT A.1  | 6.099755065 | ATA | chr11 | + | 46639914  | 46665852  | <i>ATG13</i>     | ENST00000529655.1.uORF_AT A.1                                                                                                                                                                                                                           | CDSpartial | 0.00010328 |
| ENST00000374837.3.uORF_CT G.3  | 6.083483771 | CTG | chr20 | + | 33134678  | 33137737  | <i>MAP1LC3 A</i> | -                                                                                                                                                                                                                                                       | UTR only   | 0.00031291 |
| ENST00000343245.3.uORF_AT G.2  | 6.072020855 | ATG | chr6  | - | 106773169 | 106773152 | <i>ATG5</i>      | -                                                                                                                                                                                                                                                       | UTR only   | 0.00198221 |
| ENST00000458350.3.uORF_GT G.4  | 6.030288038 | GTG | chr5  | + | 81272091  | 81272111  | <i>ATG10</i>     | -                                                                                                                                                                                                                                                       | UTR only   | 0.00028977 |
| ENST00000374837.3.uORF_CT G.2  | 6.018354115 | CTG | chr20 | + | 33134674  | 33137733  | <i>MAP1LC3 A</i> | -                                                                                                                                                                                                                                                       | UTR only   | 0.00035863 |
| ENST00000372232.3.uORF_TTG 1   | 6.010627025 | TTG | chrX  | + | 107334902 | 107335015 | <i>ATG4A</i>     | ENST00000345734.3.uORF_TTG.1                                                                                                                                                                                                                            | UTR only   | 0.00087758 |
| ENST00000526508.1.uORF_GT G.13 | 6.003172305 | GTG | chr11 | + | 46639896  | 46639913  | <i>ATG13</i>     | ENST00000533325.1.uORF_GT G.13.ENST0000057725.6.1.uORF_GT G.10.ENST0000580238.1.uORF_GT G.10.ENST00000529655.1.uORF_GT G.10.ENST00000581416.1.uORF_GT G.10.ENS T00000582547.1.uORF_GT G.10.ENST00000395549.3.uORF_GT G.7.ENST00000581438.1.uORF_GT G.13 | UTR only   | 0.00010328 |
| ENST00000343245.3.uORF_CT G.5  | 5.991564308 | CTG | chr6  | - | 106764103 | 106764095 | <i>ATG5</i>      | ENST00000369076.3.uORF_CT G.9.ENST00000360666.4.uORF_CT G.4.ENST00000369070.1.uORF_CT G.9                                                                                                                                                               | UTR only   | 7.28E-05   |
| ENST00000531818.1.uORF_CT G.8  | 5.97984111  | CTG | chr11 | + | 75690748  | 75690783  | <i>UVRAG</i>     | -                                                                                                                                                                                                                                                       | UTR only   | 0.00081058 |
| ENST00000531818.1.uORF_AT A.1  | 5.960197367 | ATA | chr11 | + | 75690730  | 75690735  | <i>UVRAG</i>     | -                                                                                                                                                                                                                                                       | UTR only   | 3.78E-06   |
| ENST00000347464.5.uORF_CT G.8  | 5.916554866 | CTG | chr2  | + | 234160449 | 234160472 | <i>ATG16L1</i>   | ENST00000392018.1.uORF_CT G.5.ENST00000444735.1.uORF_CT G.6.ENST00000392020.4.uORF_CT G.5.ENS T000000419681.1.uORF_CT G.6.ENST00000417017.1.uORF_CT G.5.ENST00000373525.5.uORF_CT G.6.ENS T000000392021.3.uORF                                          | UTR only   | 0.00081058 |

|                                |             |     |       |   |           |           |                  |                                                                                        |          |            |
|--------------------------------|-------------|-----|-------|---|-----------|-----------|------------------|----------------------------------------------------------------------------------------|----------|------------|
|                                |             |     |       |   |           |           |                  | CTG.6.ENST0000392017.4.uORF_CTG.8                                                      |          |            |
| ENST00000531818.1.uORF_CT G.14 | 5.88970653  | CTG | chr11 | + | 75690928  | 75690957  | <i>UVRAG</i>     | -                                                                                      | UTR only | 0.00081058 |
| ENST00000374837.3.uORF_CT G.4  | 5.884456624 | CTG | chr20 | + | 33137730  | 33137756  | <i>MAP1LC3 A</i> | -                                                                                      | UTR only | 0.00198221 |
| ENST00000343245.3.uORF_TTG .3  | 5.8554043   | TTG | chr6  | - | 106773178 | 106773152 | <i>ATG5</i>      | -                                                                                      | UTR only | 0.00198221 |
| ENST00000343245.3.uORF_CT G.3  | 5.844452459 | CTG | chr6  | - | 106773165 | 106764127 | <i>ATG5</i>      | -                                                                                      | UTR only | 0.00081058 |
| ENST00000458350.3.uORF_AT C.2  | 5.81421024  | ATC | chr5  | + | 81272051  | 81272059  | <i>ATG10</i>     | -                                                                                      | UTR only | 3.78E-06   |
| ENST00000531818.1.uORF_ATT .7  | 5.779854843 | ATT | chr11 | + | 75691045  | 75694431  | <i>UVRAG</i>     | -                                                                                      | UTR only | 0.00010328 |
| ENST00000343245.3.uORF_GT G.4  | 5.762007342 | GTG | chr6  | - | 106773199 | 106773152 | <i>ATG5</i>      | -                                                                                      | UTR only | 0.00198221 |
| ENST00000531818.1.uORF_CT G.16 | 5.718447194 | CTG | chr11 | + | 75691003  | 75691029  | <i>UVRAG</i>     | -                                                                                      | UTR only | 0.00081058 |
| ENST00000531818.1.uORF_CT G.6  | 5.684037918 | CTG | chr11 | + | 75690714  | 75690758  | <i>UVRAG</i>     | -                                                                                      | UTR only | 0.00070728 |
| ENST00000374837.3.uORF_CT G.1  | 5.657925397 | CTG | chr20 | + | 33134665  | 33137733  | <i>MAP1LC3 A</i> | -                                                                                      | UTR only | 0.00035863 |
| ENST00000347464.5.uORF_GT G.2  | 5.652336585 | GTG | chr2  | + | 234160265 | 234160312 | <i>ATG16L1</i>   | ENST00000392017.4.uORF_GTG.2                                                           | UTR only | 0.00011838 |
| ENST00000347464.5.uORF_CT G.2  | 5.543028801 | CTG | chr2  | + | 234160248 | 234160268 | <i>ATG16L1</i>   | ENST00000392017.4.uORF_CTG.2                                                           | UTR only | 0.00198221 |
| ENST00000343245.3.uORF_TTG .4  | 5.532355824 | TTG | chr6  | - | 106773162 | 106764127 | <i>ATG5</i>      | -                                                                                      | UTR only | 0.00081058 |
| ENST00000360666.4.uORF_GT G.2  | 5.418819162 | GTG | chr6  | - | 106773502 | 106764127 | <i>ATG5</i>      | ENST00000369076.3.uORF_GTG.6,ENST00000369070.1.uORF_GTG.6                              | UTR only | 0.00028977 |
| ENST00000347464.5.uORF_GT G.1  | 5.374769118 | GTG | chr2  | + | 234160256 | 234160312 | <i>ATG16L1</i>   | ENST00000392017.4.uORF_GTG.1                                                           | UTR only | 0.00011838 |
| ENST00000343245.3.uORF_TTG .7  | 5.349243056 | TTG | chr6  | - | 106764130 | 106764122 | <i>ATG5</i>      | ENST00000369076.3.uORF_TTG.9,ENST00000369070.1.uORF_TTG.9,ENST00000360666.4.uORF_TTG.5 | UTR only | 2.97E-05   |
| ENST00000531818.1.uORF_CT G.18 | 5.252049583 | CTG | chr11 | + | 75691024  | 75691029  | <i>UVRAG</i>     | -                                                                                      | UTR only | 7.28E-05   |
| ENST00000531818.1.uORF_CT G.20 | 5.004561642 | CTG | chr11 | + | 75691067  | 75694444  | <i>UVRAG</i>     | -                                                                                      | UTR only | 0.00081058 |
| ENST00000360666.4.uORF_TTG .3  | 4.826392874 | TTG | chr6  | - | 106764140 | 106764114 | <i>ATG5</i>      | ENST00000369070.1.uORF_TTG.7,ENST00000343245.3.uORF_TTG.5,ENST00000369076.3.uORF_TTG.7 | UTR only | 0.00070728 |
| ENST00000458350.3.uORF_CT G.13 | 4.654185152 | CTG | chr5  | + | 81272116  | 81283388  | <i>ATG10</i>     | -                                                                                      | UTR only | 0.00028901 |
| ENST00000458350.3.             | 4.652590414 | CTG | chr5  | + | 81272127  | 81272144  | <i>ATG10</i>     | -                                                                                      | UTR only | 0.00198221 |

|                                          |             |     |       |   |           |           |               |                                                                                                                                                                                                           |          |            |  |
|------------------------------------------|-------------|-----|-------|---|-----------|-----------|---------------|-----------------------------------------------------------------------------------------------------------------------------------------------------------------------------------------------------------|----------|------------|--|
| uORF_CT<br>G.14                          |             |     |       |   |           |           |               |                                                                                                                                                                                                           |          |            |  |
| ENST0000<br>0360666.4.<br>uORF_TTG<br>.1 | 4.625595081 | TTG | chr6  | - | 106773486 | 106773412 | ATG5          | ENST00000369070.1.uORF<br>_TTG.5.ENST00000369076<br>.3.uORF_TTG.5                                                                                                                                         | UTR only | 0.00035863 |  |
| ENST0000<br>0282185.3.<br>uORF_AT<br>C.2 | 4.604801993 | ATC | chr5  | + | 81283380  | 81283388  | ATG10         | ENST00000513443.1.uORF<br>_ATC.2.ENST00000513634<br>.1.uORF_ATC.1.ENST0000<br>0458350.3.uORF_ATC.4.E<br>NST00000504770.1.uORF_<br>ATC.1.ENST00000510085.<br>1.uORF_ATC.3.ENST0000<br>0355178.4.uORF_ATC.2 | UTR only | 3.78E-06   |  |
| ENST0000<br>0458350.3.<br>uORF_TTG<br>2  | 4.541802367 | TTG | chr5  | + | 81272130  | 81272144  | ATG10         | -                                                                                                                                                                                                         | UTR only | 0.00198221 |  |
| ENST0000<br>0360666.4.<br>uORF_AT<br>C.1 | 4.423875553 | ATC | chr6  | - | 106773458 | 106773402 | ATG5          | ENST00000369070.1.uORF<br>_ATC.1.ENST00000369076<br>.3.uORF_ATC.1                                                                                                                                         | UTR only | 0.00010328 |  |
| ENST0000<br>0360666.4.<br>uORF_CT<br>G.3 | 4.136076832 | CTG | chr6  | - | 106764112 | 106764095 | ATG5          | ENST00000369076.3.uORF<br>_CTG.8.ENST00000369070<br>.1.uORF_CTG.8.ENST0000<br>0343245.3.uORF_CTG.4                                                                                                        | UTR only | 0.00198221 |  |
| ENST0000<br>0458350.3.<br>uORF_ATT<br>3  | 3.861777206 | ATT | chr5  | + | 81272140  | 81283388  | ATG10         | -                                                                                                                                                                                                         | UTR only | 4.22E-05   |  |
| ENST0000<br>0458350.3.<br>uORF_ATT<br>4  | 3.818852181 | ATT | chr5  | + | 81283383  | 81283388  | ATG10         | ENST00000513443.1.uORF<br>_ATT.4.ENST00000513634<br>.1.uORF_ATT.1.ENST0000<br>0510085.1.uORF_ATT.3.E<br>NST00000504770.1.uORF_<br>ATT.1.ENST00000282185.<br>3.uORF_ATT.2.ENST0000<br>0355178.4.uORF_ATT.2 | UTR only | 3.78E-06   |  |
| ENST0000<br>0360666.4.<br>uORF_GT<br>G.3 | 3.668030927 | GTG | chr6  | - | 106773440 | 106773402 | ATG5          | ENST00000369076.3.uORF<br>_GTG.7.ENST00000369070<br>.1.uORF_GTG.7                                                                                                                                         | UTR only | 0.00028977 |  |
| ENST0000<br>0568455.1.<br>uORF_AT<br>G.3 | 3.444626878 | ATG | chr16 | + | 75600579  | 75600611  | GABARAP<br>L2 | -                                                                                                                                                                                                         | UTR only | 0.00198221 |  |
| ENST0000<br>0568455.1.<br>uORF_AT<br>G.1 | 3.431431314 | ATG | chr16 | + | 75600516  | 75600611  | GABARAP<br>L2 | -                                                                                                                                                                                                         | UTR only | 0.00198221 |  |
| ENST0000<br>0568455.1.<br>uORF_CT<br>G.1 | 3.059147152 | CTG | chr16 | + | 75600521  | 75600574  | GABARAP<br>L2 | -                                                                                                                                                                                                         | UTR only | 0.9026072  |  |
| ENST0000<br>0568455.1.<br>uORF_AT<br>G.2 | 2.888471924 | ATG | chr16 | + | 75600543  | 75600611  | GABARAP<br>L2 | -                                                                                                                                                                                                         | UTR only | 0.00198221 |  |
| ENST0000<br>0568455.1.<br>uORF_CT<br>G.4 | 2.755945365 | CTG | chr16 | + | 75600548  | 75600574  | GABARAP<br>L2 | -                                                                                                                                                                                                         | UTR only | 0.9026072  |  |
| ENST0000<br>0568455.1.<br>uORF_CT<br>G.5 | 2.443457882 | CTG | chr16 | + | 75600571  | 75601938  | GABARAP<br>L2 | -                                                                                                                                                                                                         | UTR only | 0.00087758 |  |
| ENST0000<br>0588156.1.<br>uORF_CT<br>G.1 | 2.433656987 | CTG | chr18 | + | 39637814  | 39637864  | PIK3C3        | ENST00000587261.1.uORF<br>_CTG.5                                                                                                                                                                          | UTR only | 0.00070728 |  |
| ENST0000<br>0568455.1.<br>uORF_CT<br>G.7 | 2.329874105 | CTG | chr16 | + | 75600654  | 75600751  | GABARAP<br>L2 | -                                                                                                                                                                                                         | UTR only | 7.28E-05   |  |
| ENST0000<br>0568455.1.<br>uORF_CT<br>G.3 | 2.286069484 | CTG | chr16 | + | 75600531  | 75600611  | GABARAP<br>L2 | -                                                                                                                                                                                                         | UTR only | 0.00198221 |  |
| ENST0000<br>0369070.1.<br>uORF_GT<br>G.4 | 2.230553353 | GTG | chr6  | - | 106773562 | 106764127 | ATG5          | ENST00000369076.3.uORF<br>_GTG.4                                                                                                                                                                          | UTR only | 0.00028977 |  |
| ENST0000<br>0568455.1.                   | 2.214154243 | TTG | chr16 | + | 75600598  | 75601938  | GABARAP<br>L2 | -                                                                                                                                                                                                         | UTR only | 0.00087758 |  |

|                                          |             |     |       |   |           |           |                       |                                                                                                                                                                                                                                                                                                                                                                                                                                                                                                                                                                                                         |  |            |            |
|------------------------------------------|-------------|-----|-------|---|-----------|-----------|-----------------------|---------------------------------------------------------------------------------------------------------------------------------------------------------------------------------------------------------------------------------------------------------------------------------------------------------------------------------------------------------------------------------------------------------------------------------------------------------------------------------------------------------------------------------------------------------------------------------------------------------|--|------------|------------|
| uORF_TTG<br>.1                           |             |     |       |   |           |           |                       |                                                                                                                                                                                                                                                                                                                                                                                                                                                                                                                                                                                                         |  |            |            |
| ENST0000<br>0568455.1.<br>uORF_CT<br>G.2 | 2.205203139 | CTG | chr16 | + | 75600524  | 75600574  | <i>GABARAP<br/>L2</i> | -                                                                                                                                                                                                                                                                                                                                                                                                                                                                                                                                                                                                       |  | UTR only   | 0.9026072  |
| ENST0000<br>0568455.1.<br>uORF_CT<br>G.6 | 2.100576331 | CTG | chr16 | + | 75600601  | 75601938  | <i>GABARAP<br/>L2</i> | -                                                                                                                                                                                                                                                                                                                                                                                                                                                                                                                                                                                                       |  | UTR only   | 0.00087758 |
| ENST0000<br>0359513.4.<br>uORF_AT<br>C.1 | 1.987842832 | ATC | chr11 | + | 46639311  | 46666901  | <i>ATG13</i>          | ENST00000529655.1.uORF<br>_ATC.1.ENST00000528494<br>.1.uORF_ATC.1                                                                                                                                                                                                                                                                                                                                                                                                                                                                                                                                       |  | CDSpartial | 0.00012783 |
| ENST0000<br>0359513.4.<br>uORF_CT<br>G.7 | 1.783690992 | CTG | chr11 | + | 46639331  | 46665838  | <i>ATG13</i>          | ENST00000528494.1.uORF<br>_CTG.7                                                                                                                                                                                                                                                                                                                                                                                                                                                                                                                                                                        |  | UTR only   | 0.00087758 |
| ENST0000<br>0369070.1.<br>uORF_GT<br>G.2 | 1.737868356 | GTG | chr6  | - | 106773655 | 106764127 | <i>ATG5</i>           | ENST00000369076.3.uORF<br>_GTG.2                                                                                                                                                                                                                                                                                                                                                                                                                                                                                                                                                                        |  | UTR only   | 0.00028977 |
| ENST0000<br>0568455.1.<br>uORF_GT<br>G.2 | 1.710220375 | GTG | chr16 | + | 75600551  | 75600574  | <i>GABARAP<br/>L2</i> | -                                                                                                                                                                                                                                                                                                                                                                                                                                                                                                                                                                                                       |  | UTR only   | 0.5749201  |
| ENST0000<br>0568455.1.<br>uORF_GT<br>G.1 | 1.634252651 | GTG | chr16 | + | 75600502  | 75601938  | <i>GABARAP<br/>L2</i> | -                                                                                                                                                                                                                                                                                                                                                                                                                                                                                                                                                                                                       |  | UTR only   | 0.00028977 |
| ENST0000<br>0369070.1.<br>uORF_TTG<br>2  | 1.625731632 | TTG | chr6  | - | 106773631 | 106764127 | <i>ATG5</i>           | ENST00000369076.3.uORF<br>_TTG.2                                                                                                                                                                                                                                                                                                                                                                                                                                                                                                                                                                        |  | UTR only   | 0.00087758 |
| ENST0000<br>0359513.4.<br>uORF_CT<br>G.8 | 1.502337399 | CTG | chr11 | + | 46639372  | 46639401  | <i>ATG13</i>          | ENST00000533325.1.uORF<br>_CTG.8.ENST00000577256<br>.1.uORF_CTG.8.ENST0000<br>0524625.1.uORF_CTG.8.E<br>NST00000582547.1.uORF<br>_CTG.8.ENST00000395549.<br>3.uORF_CTG.1.ENST0000<br>0583249.1.uORF_CTG.8.E<br>NST00000526508.1.uORF<br>_CTG.8.ENST00000451945.<br>1.uORF_CTG.13.ENST000<br>00312040.4.uORF_CTG.13.<br>ENST00000530500.1.uORF<br>_CTG.8.ENST00000580238<br>.1.uORF_CTG.8.ENST0000<br>0578626.1.uORF_CTG.8.E<br>NST00000581438.1.uORF<br>_CTG.8.ENST00000581416.<br>1.uORF_CTG.8.ENST0000<br>0528494.1.uORF_CTG.8.E<br>NST00000529655.1.uORF<br>_CTG.8.ENST00000434074.<br>1.uORF_CTG.13 |  | UTR only   | 0.00198221 |
| ENST0000<br>0359513.4.<br>uORF_GT<br>G.6 | 1.497221015 | GTG | chr11 | + | 46639320  | 46666901  | <i>ATG13</i>          | ENST00000528494.1.uORF<br>_GTG.6.ENST00000529655<br>.1.uORF_GTG.6                                                                                                                                                                                                                                                                                                                                                                                                                                                                                                                                       |  | CDSpartial | 0.00012783 |
| ENST0000<br>0586417.1.<br>uORF_AC<br>G.1 | 1.470961764 | ACG | chr19 | + | 10654653  | 10654667  | <i>ATG4D</i>          | ENST00000585752.1.uORF<br>_ACG.1.ENST0000058885<br>7.1.uORF_ACG.1.ENST000<br>00588667.1.uORF_ACG.1,<br>ENST00000309469.4.uORF<br>_ACG.1                                                                                                                                                                                                                                                                                                                                                                                                                                                                 |  | UTR only   | 0.00028977 |
| ENST0000<br>0496423.1.<br>uORF_AC<br>G.1 | 1.428896253 | ACG | chr3  | - | 112280427 | 112280359 | <i>ATG3</i>           | ENST00000402314.2.uORF<br>_ACG.1.ENST0000028329<br>0.5.uORF_ACG.3                                                                                                                                                                                                                                                                                                                                                                                                                                                                                                                                       |  | CDSpartial | 0.00010328 |
| ENST0000<br>0359513.4.<br>uORF_CT<br>G.4 | 1.401178938 | CTG | chr11 | + | 46639268  | 46665838  | <i>ATG13</i>          | ENST00000528494.1.uORF<br>_CTG.4                                                                                                                                                                                                                                                                                                                                                                                                                                                                                                                                                                        |  | UTR only   | 0.00087758 |
| ENST0000<br>0586417.1.<br>uORF_CT<br>G.1 | 1.314234062 | CTG | chr19 | + | 10654583  | 10654594  | <i>ATG4D</i>          | -                                                                                                                                                                                                                                                                                                                                                                                                                                                                                                                                                                                                       |  | UTR only   | 0.9026072  |
| ENST0000<br>0588857.1.<br>uORF_AT<br>G.2 | 1.24595116  | ATG | chr19 | + | 10654602  | 10654667  | <i>ATG4D</i>          | ENST00000309469.4.uORF<br>_ATG.2.ENST00000585752<br>.1.uORF_ATG.2.ENST0000<br>0586417.1.uORF_ATG.2                                                                                                                                                                                                                                                                                                                                                                                                                                                                                                      |  | UTR only   | 0.8038648  |

|                               |             |     |       |   |           |           |                   |                                                                                                                                                                                                                                         |            |            |
|-------------------------------|-------------|-----|-------|---|-----------|-----------|-------------------|-----------------------------------------------------------------------------------------------------------------------------------------------------------------------------------------------------------------------------------------|------------|------------|
| ENST00000359513.4.uORF_GT G.5 | 1.092360622 | GTG | chr11 | + | 46639305  | 46666901  | <i>ATG13</i>      | ENST00000528494.1.uORF_GTG.5,ENST00000529655.1.uORF_GTG.5                                                                                                                                                                               | CDSpartial | 0.00012783 |
| ENST00000369070.1.uORF_CT G.1 | 1.088920495 | CTG | chr6  | - | 106773666 | 106773412 | <i>ATG5</i>       | ENST00000369076.3.uORF_CTG.1                                                                                                                                                                                                            | UTR only   | 0.00087758 |
| ENST00000369070.1.uORF_GT G.5 | 1.054336932 | GTG | chr6  | - | 106773504 | 106773412 | <i>ATG5</i>       | ENST00000369076.3.uORF_GTG.5,ENST00000360666.4.uORF_GTG.1                                                                                                                                                                               | UTR only   | 0.00011838 |
| ENST00000369070.1.uORF_TTG .1 | 0.996280549 | TTG | chr6  | - | 106773660 | 106773412 | <i>ATG5</i>       | ENST00000369076.3.uORF_TTG.1                                                                                                                                                                                                            | UTR only   | 0.00035863 |
| ENST00000568455.1.uORF_AC G.1 | 0.969555193 | ACG | chr16 | + | 75600638  | 75601972  | <i>GABARAP L2</i> | -                                                                                                                                                                                                                                       | UTR only   | 0.00035863 |
| ENST00000302386.5.uORF_AT G.4 | 0.813640705 | ATG | chr17 | - | 7145898   | 7145890   | <i>GABARAP</i>    | -                                                                                                                                                                                                                                       | UTR only   | 0.2534805  |
| ENST00000546360.1.uORF_CT G.3 | 0.715011923 | CTG | chr17 | - | 66453605  | 66453522  | <i>WIP1</i>       | ENST00000589316.1.uORF_CTG.3                                                                                                                                                                                                            | UTR only   | 0.00087758 |
| ENST00000546360.1.uORF_CT G.2 | 0.518560233 | CTG | chr17 | - | 66453614  | 66453522  | <i>WIP1</i>       | ENST00000589316.1.uORF_CTG.2                                                                                                                                                                                                            | UTR only   | 0.00087758 |
| ENST00000369070.1.uORF_TTG .6 | 0.401149823 | TTG | chr6  | - | 106773410 | 106773402 | <i>ATG5</i>       | ENST00000360666.4.uORF_TTG.2,ENST00000369076.3.uORF_TTG.6                                                                                                                                                                               | UTR only   | 7.28E-05   |
| ENST00000588857.1.uORF_AT G.1 | 0.360045192 | ATG | chr19 | + | 10654596  | 10654667  | <i>ATG4D</i>      | ENST00000586417.1.uORF_ATG.1,ENST00000585752.1.uORF_ATG.1,ENST00000309469.4.uORF_ATG.1                                                                                                                                                  | UTR only   | 0.9026072  |
| ENST00000302386.5.uORF_AC G.4 | 0.355194683 | ACG | chr17 | - | 7145904   | 7145890   | <i>GABARAP</i>    | -                                                                                                                                                                                                                                       | UTR only   | 0.00198221 |
| ENST00000586417.1.uORF_AT C.1 | 0.2372352   | ATC | chr19 | + | 10654573  | 10654614  | <i>ATG4D</i>      | -                                                                                                                                                                                                                                       | UTR only   | 0.00010328 |
| ENST00000359513.4.uORF_TTG .1 | 0.16025574  | TTG | chr11 | + | 46639422  | 46666901  | <i>ATG13</i>      | ENST00000528494.1.uORF_TTG.1,ENST00000529655.1.uORF_TTG.1                                                                                                                                                                               | CDSpartial | 0.00012783 |
| ENST00000392021.3.uORF_GT G.4 | 0.123538204 | GTG | chr2  | + | 234160360 | 234160452 | <i>ATG16L1</i>    | ENST00000392018.1.uORF_GTG.1,ENST00000417017.1.uORF_GTG.3,ENST00000392017.4.uORF_GTG.6,ENST00000392020.4.uORF_GTG.3,ENST00000419681.1.uORF_GTG.4,ENST00000444735.1.uORF_GTG.4,ENST00000347464.5.uORF_GTG.6,ENST00000373525.5.uORF_GTG.4 | UTR only   | 0.00031291 |
| ENST00000302386.5.uORF_GT G.6 | 0.008354834 | GTG | chr17 | - | 7145773   | 7145744   | <i>GABARAP</i>    | -                                                                                                                                                                                                                                       | UTR only   | 0.00010328 |
| ENST00000369076.3.uORF_CT G.5 | 19.00261234 | CTG | chr6  | - | 106773536 | 106773402 | <i>ATG5</i>       | ENST00000369070.1.uORF_CTG.5                                                                                                                                                                                                            | UTR only   | 4.22E-05   |
| ENST00000369076.3.uORF_AT G.1 | 18.70669535 | ATG | chr6  | - | 106764108 | 106764073 | <i>ATG5</i>       | ENST00000343245.3.uORF_ATG.3,ENST00000360666.4.uORF_ATG.1,ENST00000369070.1.uORF_ATG.1                                                                                                                                                  | CDSpartial | 0.00010328 |
| ENST00000317868.4.uORF_CT G.3 | 8.044775339 | CTG | chr1  | + | 63249824  | 63269406  | <i>ATG4C</i>      | ENST00000371120.3.uORF_CTG.3                                                                                                                                                                                                            | UTR only   | 0.00031291 |
| ENST00000317868.4.uORF_CT G.8 | 7.500556761 | CTG | chr1  | + | 63249881  | 63269406  | <i>ATG4C</i>      | ENST00000371120.3.uORF_CTG.8                                                                                                                                                                                                            | UTR only   | 0.00011838 |
| ENST00000435644.2.            | 23.18156575 | ATG | chr8  | - | 53626738  | 53626724  | <i>RB1CC1</i>     | ENST00000025008.5.uORF_ATG.1,ENST00000517963                                                                                                                                                                                            | UTR only   | 0.00198221 |

|                                          |             |     |       |   |           |           |               |  |                                                                                                                                                                          |            |            |
|------------------------------------------|-------------|-----|-------|---|-----------|-----------|---------------|--|--------------------------------------------------------------------------------------------------------------------------------------------------------------------------|------------|------------|
| uORF_AT<br>G.1                           |             |     |       |   |           |           |               |  | .1.uORF_ATG.2.ENST0000<br>0518710.1.uORF_ATG.1,E<br>NST00000518211.1.uORF_<br>ATG.1                                                                                      |            |            |
| ENST0000<br>0435644.2.<br>uORF_TTG<br>.1 | 21.73051614 | TTG | chr8  | - | 53626935  | 53626894  | <i>RB1CC1</i> |  | ENST00000025008.5.uORF<br>_TTG.1,ENST00000518211<br>.1.uORF_TTG.1,ENST0000<br>0518710.1.uORF_TTG.1,E<br>NST00000517963.1.uORF_<br>TTG.1                                  | UTR only   | 0.00010328 |
| ENST0000<br>0369076.3.<br>uORF_CT<br>G.3 | 19.27891224 | CTG | chr6  | - | 106773615 | 106773412 | <i>ATG5</i>   |  | ENST00000369070.1.uORF<br>_CTG.3                                                                                                                                         | UTR only   | 0.00035863 |
| ENST0000<br>0369076.3.<br>uORF_CT<br>G.7 | 18.51639297 | CTG | chr6  | - | 106773456 | 106773412 | <i>ATG5</i>   |  | ENST00000369070.1.uORF<br>_CTG.7,ENST00000360666<br>.4.uORF_CTG.2                                                                                                        | UTR only   | 3.78E-06   |
| ENST0000<br>0369076.3.<br>uORF_TTG<br>.8 | 17.46064985 | TTG | chr6  | - | 106764134 | 106764114 | <i>ATG5</i>   |  | ENST00000369070.1.uORF<br>_TTG.8,ENST00000343245<br>.3.uORF_TTG.6,ENST0000<br>0360666.4.uORF_TTG.4                                                                       | UTR only   | 0.00031291 |
| ENST0000<br>0356136.3.<br>uORF_GT<br>G.3 | 16.80914625 | GTG | chr11 | + | 75526349  | 75526363  | <i>UVRAG</i>  |  | -                                                                                                                                                                        | UTR only   | 4.22E-05   |
| ENST0000<br>0371120.3.<br>uORF_CT<br>G.8 | 11.0504456  | CTG | chr1  | + | 63249881  | 63269406  | <i>ATG4C</i>  |  | ENST00000317868.4.uORF<br>_CTG.8                                                                                                                                         | UTR only   | 0.00087758 |
| ENST0000<br>0317868.4.<br>uORF_AT<br>G.1 | 9.017057651 | ATG | chr1  | + | 63269420  | 63269455  | <i>ATG4C</i>  |  | ENST00000371118.1.uORF<br>_ATG.1,ENST00000371120<br>.3.uORF_ATG.1                                                                                                        | UTR only   | 0.00198221 |
| ENST0000<br>0458350.3.<br>uORF_AT<br>G.1 | 8.286838502 | ATG | chr5  | + | 81272042  | 81272059  | <i>ATG10</i>  |  | -                                                                                                                                                                        | UTR only   | 0.00087758 |
| ENST0000<br>0345734.3.<br>uORF_AT<br>G.1 | 0.017910246 | ATG | chrX  | + | 107335043 | 107369354 | <i>ATG4A</i>  |  | ENST00000372232.3.uORF<br>_ATG.1,ENST00000372246<br>.3.uORF_ATG.1,ENST0000<br>0545696.1.uORF_ATG.1,E<br>NST00000372254.3.uORF_<br>ATG.1,ENST00000343524.<br>5.uORF_ATG.1 | CDSpartial | 0.00087758 |

**Table S3.** ExAC singleton variants associated with uORFs of *ATG* genes.

| uORF_ID                           | uORF_s<br>core  | Chromosome | location      | ref_allele | alt_allele | Strand | ref_codon | alt_codon | Gene                 | allele_frequency |
|-----------------------------------|-----------------|------------|---------------|------------|------------|--------|-----------|-----------|----------------------|------------------|
| ENST00000317868.4.uO<br>RF ATG.1  | 9.017057<br>651 | chr1       | 632694<br>21  | T          | G          | +      | ATG       | AGG       | <i>ATG4C</i>         | 8.24E-06         |
| ENST00000360666.4.uO<br>RF CTG.3  | 4.136076<br>832 | chr6       | 106764<br>110 | C          | G          | -      | CTG       | CTC       | <i>ATG5</i>          | 8.24E-06         |
| ENST00000435644.2.uO<br>RF CTG.14 | 19.37154<br>001 | chr8       | 535980<br>75  | C          | T          | -      | CTG       | CTA       | <i>RB1CC1</i>        | 8.33E-06         |
| ENST00000435644.2.uO<br>RF CTG.14 | 19.37154<br>001 | chr8       | 535980<br>75  | C          | A          | -      | CTG       | CTT       | <i>RB1CC1</i>        | 8.33E-06         |
| ENST00000435510.2.uO<br>RF CTG.2  | 9.394652<br>399 | chr10      | 648931<br>49  | G          | T          | +      | CTG       | CTT       | <i>NRBF2</i>         | 8.25E-06         |
| ENST00000395544.4.uO<br>RF CTG.12 | 20.05793<br>489 | chr17      | 197707<br>73  | G          | A          | -      | CTG       | TTG       | <i>ULK2</i>          | 8.50E-06         |
| ENST00000395544.4.uO<br>RF CTG.11 | 18.66606<br>084 | chr17      | 197707<br>82  | A          | C          | -      | CTG       | CGG       | <i>ULK2</i>          | 8.51E-06         |
| ENST00000262039.4.uO<br>RF CTG.2  | 19.09517<br>645 | chr18      | 395352<br>13  | G          | A          | +      | CTG       | CTA       | <i>PIK3C3</i>        | 8.24E-06         |
| ENST00000588156.1.uO<br>RF CTG.1  | 2.433656<br>987 | chr18      | 396378<br>14  | C          | G          | +      | CTG       | GTG       | <i>PIK3C3</i>        | 8.24E-06         |
| ENST00000588156.1.uO<br>RF CTG.1  | 2.433656<br>987 | chr18      | 396378<br>16  | G          | T          | +      | CTG       | CTT       | <i>PIK3C3</i>        | 8.24E-06         |
| ENST00000374837.3.uO<br>RF CTG.7  | 6.445196<br>579 | chr20      | 331377<br>65  | C          | G          | +      | CTG       | GTG       | <i>MAP1L<br/>C3A</i> | 8.24E-06         |
| ENST00000371120.3.uO<br>RF GTG.5  | 11.70672<br>367 | chr1       | 632694<br>30  | G          | C          | +      | GTG       | CTG       | <i>ATG4C</i>         | 8.24E-06         |
| ENST00000247178.5.uO<br>RF GTG.1  | 19.13701<br>322 | chr14      | 558785<br>64  | C          | T          | -      | GTG       | GTA       | <i>ATG14</i>         | 8.59E-06         |
| ENST00000435644.2.uO<br>RF ATC.4  | 18.82498<br>515 | chr8       | 535980<br>71  | G          | T          | -      | ATC       | ATA       | <i>RB1CC1</i>        | 8.32E-06         |
| ENST00000268607.5.uO<br>RF ATC.4  | 19.37333<br>67  | chr16      | 874260<br>23  | A          | G          | +      | ATC       | GTC       | <i>MAP1L<br/>C3B</i> | 1.04E-05         |
| ENST00000458350.3.uO<br>RF ATT.4  | 3.818852<br>181 | chr5       | 812833<br>84  | T          | G          | +      | ATT       | AGT       | <i>ATG10</i>         | 8.24E-06         |



**Table S4.** Yeast strains used in the study.

| Name    | Genotype                                                                                        |
|---------|-------------------------------------------------------------------------------------------------|
| SEY6210 | MATa <i>leu2-3,112 ura3-52 his3-Δ200 trp1-Δ901 suc2-Δ9 lys2-801 GAL</i>                         |
| WLY176  | SEY6210 <i>pho13Δ pho8Δ60</i>                                                                   |
| YYY140  | WLY176 <i>GFP-ATG8::LEU2</i>                                                                    |
| YYY178  | WLY176 <i>GFP-ATG8::LEU2 atg5Δ::KAN</i>                                                         |
| YYY182  | WLY176 <i>GFP-ATG8::LEU2 atg5Δ::KAN pRS416-ATG5 5'UTR-ATG5-PA::URA3</i>                         |
| YYY193  | WLY176 <i>GFP-ATG8::LEU2 atg5Δ::KAN pRS416-ATG5 5'UTR(mut3)-ATG5-PA::URA3</i>                   |
| YYY194  | WLY176 <i>GFP-ATG8::LEU2 atg5Δ::KAN pRS416-ATG5 5'UTR(mut2)-ATG5-PA::URA3</i>                   |
| YYY195  | WLY176 <i>GFP-ATG8::LEU2 atg5Δ::KAN pRS416-ATG5 5'UTR(mut1)-ATG5-PA::URA3</i>                   |
| YYY232  | SEY6210 <i>atg13Δ::HIS3 pRS406-ATG19 5'UTR(mut)-ATG19-PA::URA3</i>                              |
| YYY233  | SEY6210 <i>atg13Δ::HIS3 pRS406-ATG19 5'UTR-ATG19-PA::URA3</i>                                   |
| YYY234  | SEY6210 <i>atg13Δ::HIS3</i>                                                                     |
| YYY236  | WLY176 <i>GFP-ATG8::LEU2 atg12Δ::HIS3 pRS406-ATG12 5'UTR-ATG12-PA::URA3</i>                     |
| YYY237  | WLY176 <i>GFP-ATG8::LEU2 atg12Δ::HIS3</i>                                                       |
| YYY238  | WLY176 <i>GFP-ATG8::LEU2 atg12Δ::HIS3 pRS406-ATG12 5'UTR(mut)-ATG12-PA::URA3</i>                |
| YYY239  | WLY176 <i>pCu-GFP-ATG8::LEU2 atg13Δ::HIS3 pRS406-ATG13 5'UTR(mut)-ATG13-PA::URA3</i>            |
| YYY247  | WLY176 <i>pCu-GFP-ATG8::LEU2 atg13Δ::HIS3</i>                                                   |
| YYY249  | WLY176 <i>pCu-GFP-ATG8::LEU2 atg13Δ::HIS3 pRS416-pCu-ATG13-PA::URA3</i>                         |
| YYY250  | WLY176 <i>pCu-GFP-ATG8::LEU2 atg13Δ::HIS3 pRS406-ATG13 5'UTR-ATG13-PA::URA3</i>                 |
| YYY253  | WLY176 <i>pCu-GFP-ATG8::LEU2 atg13Δ::HIS3 gcn2Δ::KAN pRS406-ATG13 5'UTR(mut)-ATG13-PA::URA3</i> |
| YYY254  | WLY176 <i>pCu-GFP-ATG8::LEU2 atg13Δ::HIS3 gcn2Δ::KAN pRS406-ATG13 5'UTR-ATG13-PA::URA3</i>      |

The yeast strain names and genotypes are indicated. The parental strain used for subsequent genetic modification is indicated as the first part of the genotype.

**Table S5.** Primers for plasmid cloning and strains construction.

|             |                           |
|-------------|---------------------------|
| Firefly for | ATCCATCTTGCTCCAACACC      |
| Firefly rev | TCGCGGTTGTTACTTGACTG      |
| Renilla for | GGAATTATAATGCTTATCTACGTGC |
| Renilla rev | CTGCGAAAAATGAAGACCTTTTAC  |
| ATG4B for   | ACGTCCTGAACCTGTCCTA       |
| ATG4B rev   | CCCGACCCAGGATTTTCAA       |
| ATG12 for   | AAGTGGGCAGTAGAGCGAAC      |
| ATG12 rev   | CACGCCTGAGACTTGCAGTA      |

**Table S6.** Primers for RT-qPCR in human cells.

|                        |                                                              |
|------------------------|--------------------------------------------------------------|
| ATG5TAG FC ins F       | ATAGGGCGAATTGGGTACCACCGGATAACAGAGTAACTGG                     |
| ATG5TAG FC ins R       | GCAATTAACCCTCACTAAAGGGGAGAAAAGCAACCTGACCTAC                  |
| ATG5TAG FC tem F       | GTAGGTCAGGTTGCTTTCTCCCCTTTAGTGAGGGTTAATTGC                   |
| ATG5TAG FC tem R       | CCAGTTACTCTGTTATCCGGTGGTACCCAATTCGCCCTAT                     |
| ATG5 uORF delta FC For | GATAAATTATCATCACCTTTTTACTAAATATAAGTATGAATGACATTAACAATTACTTTG |
| ATG5 uORF delta FC REV | CAAAGTAATTGTTAATGTCATTACTTATATTTAGTGTAAGGATGATGATAATTTATC    |
| Atg19 FC tem F         | TAGCATTGTCCTCTGTTATTCGTCCTTTAGTGAGGGTTAATTGC                 |
| Atg19 FC tem R         | TCGTAAACCAACAGGGTGTGGTACCCAATTCGCCCTAT                       |
| Atg19 FC ins F         | ATAGGGCGAATTGGGTACCACACCTGTTGGTTTACGA                        |
| Atg19 FC ins R         | GCAATTAACCCTCACTAAAGGGACGAATAACAGAGGACAATGCTA                |
| Atg19 SDM F1           | AAATCTCCTTGATTTGAGTTTGATAAGGTGTATCAGACGAAAAGAAGACTGAATC      |
| Atg19 SDM R1           | ATCAAACCTCAAATCAAGGAGATTACGTGAGCCTTGAATTCCTTTTCC             |
| Atg19 SDM F2           | CATTGCATAGTATTTGTTTACCTGAGGAAAAAGGAATTCAAGGCTCACGT           |
| Atg19 SDM R2           | TCAGGTAAACAAATACTATGCAATGTCACACGCCCTTTTCCGG                  |
| Atg5-PA 416 SDM TTG F1 | ATAGGAAACCTTTGTTGTAAGTATGAATGACATTAACAATTACTTTGGAATGGTGAGC   |
| Atg5-PA 416 SDM TTG F2 | AAATATTGAAGTAGCTTGCTCAGAAGTGCATTGAATTTTGTCTTTTGGT            |
| Atg5-PA 416 SDM TTG R1 | CATACTTACAACAAAGGTTTCTATCTCCGTTCTTCTAGAACCAAAAGAACAAAA       |
| Atg5-PA 416 SDM TTG R2 | TGAGCAAGCTACTTCAATATTTAGTGTAAGGATGATGATAATTTATCTAAAGAGGC     |
| Atg5-PA 416 SDM TTG F3 | GAAGTGCATTGAATTTTGTCTTTTGGTTCTAGAAGAACGGAGATAGG              |
| Atg5-PA 416 SDM TTG R3 | ACAAAAATTCAATCGCACTTCTGAGCATGCTACTTCATTATTTAGTGTAAGGATG      |
| Atg5-PA 416 SDM TTG F4 | AAATAATGAAGTAGCTTGCTCAGAAGTGCGAATGAATTTTGTCTTTTGGT           |
| Atg5-PA 416 SDM TTG R4 | TGAGCAAGCTACTTATGTATTTAGTGTAAGGATGATGATAATTTATCTAAAGAGGC     |
| Atg5-PA 416 SDM TTG F5 | TCATTTTGTGAAAGGAAGTCCAAGAGAAATTGCGGTGCTACG                   |
| Atg5-PA 416 SDM TTG R5 | ACTTCCTTCAACAAAAATGAAGGATCGATCGATACCAGCACATT                 |
| Atg5-PA 416 SDM TTG F6 | TAGTCAATTATTTGCCCTCATTGGAACAAGATTAAGCTTTCTTTCTTTGAC          |
| Atg5-PA 416 SDM TTG R6 | TGAGGGGCAAATAATTGACTAAATATGTTTCCCTTGGTACCCTTATTCGTA          |
| ATG13TAG FC ins F      | ATAGGGCGAATTGGGTACCACCGCTACGAAGATGATTCCTGA                   |
| ATG13TAG FC ins R      | GCAATTAACCCTCACTAAAGGGGAGAAAAGCAACCTGACCTAC                  |
| ATG13TAG FC tem F      | GTAGGTCAGGTTGCTTTCTCCCCTTTAGTGAGGGTTAATTGC                   |
| ATG13TAG FC tem R      | TCAGGAATCATCTTCGTAGGCGGTACCCAATTCGCCCTAT                     |
| ATG12TAG FC ins F      | ATAGGGCGAATTGGGTACCAGTCCATTAGTGCTGAGTATC                     |
| ATG12TAG FC ins R      | GCAATTAACCCTCACTAAAGGGGAGAAAAGCAACCTGACCTAC                  |
| ATG12TAG FC tem F      | GTAGGTCAGGTTGCTTTCTCCCCTTTAGTGAGGGTTAATTGC                   |
| ATG12TAG FC tem R      | GATACTCAGACACTAATGGAACCGGTACCCAATTCGCCCTAT                   |
| ATG12 DEL F            | CCTAACTGTATATTCTACAGTAGAGTGAACCAATGACAGTCAGCTGAAGCTTCGTACGC  |
| ATG12 DEL R            | CTGTAGGTTTCTTCTTAGACCATTCCAGCGCCCGGTATGCATAGGCCACTAGTGGATCTG |
| ATG12 DEL CHECK        | CCTTGATTGAGATGGCATAG                                         |

|                    |                                                                |
|--------------------|----------------------------------------------------------------|
| ATG12 SDM UORF F   | AGTGAACCATTGACAGTATGAGTAGGATCCTAGAGAGCGAAAATGAAAC              |
| ATG12 SDM UORF R   | CATACTGTCAATGGTTCCTACTCTACTGTAGAATATACAGTTAGGGATGTACGTTTATTT   |
| ATG13 SDM UORF F   | GTTGAATAGCTTGAGTCATGGTTGCCGAAGAGGACATCGAGAA                    |
| ATG13 SDM UORF R   | CATGACTCAAGCTATTCAACCGGGCTGTATGTTCTGCTTTCTTTTC                 |
| GCN2 DEL F         | TCAATAATTTTCCGTTCCCTTAACACATACTATGTATAACGTACGCTGCAGGTGCGAC     |
| GCN2 DEL R         | TTAACTGATGCGTTATAGCGCCGCACAGATCTTTAAAGGCAATCGATGAATTCGAGCTCG   |
| GCN2 DEL CHECK NAT | AAGAATCTTCCACCCATTG                                            |
| Atg19-PA FC ins F  | CCCTGACTTGGGAAGAAGTCCGGATCCCCGGGTAAATTA                        |
| Atg19-PA FC ins R  | GCAATTAACCCCTACTAAAGGGGAGAAAGCAACCTGACCTAC                     |
| Atg19-PA FC tem F  | GTAGGTCAGGTTGCTTTCTCCCTTAGTGAGGGTAAATTGC                       |
| Atg19-PA FC tem R  | TTAATTAACCCGGGGATCCGGAGTTCTTCCCAAGTCAGGG                       |
| Atg19 del F        | GGCACTTGCTTCAGTAACGCCCAAAGGAGAGTTCTGGTAACAGCTGAAGCTTCGTACGC    |
| Atg19 del R        | GTGAAAAGGTACTCATTGCTGTATAAAAATAGAGTTTGACGCATAGGCCACTAGTGGATCTG |
| Atg19 check F      | CACATCACATTGAGAACGAGG                                          |
| ATG13 SIDE-UORF F  | GTTGAATTGCATGAGTCATGGTTGCCGAAGAGGACATCGAGAA                    |
| ATG13 SIDE-UORF R  | CATGACTCATGCAATTCACCGGGCTGTATGTTCTGCTTTCTTTTC                  |
| ATG13 FAR-UORF F   | TACACCTCCTGGCTCAAGTCTTGAAAAGAAAGCAGAACATACAGCCC                |
| ATG13 FAR-UORF R   | TGAGCCAGGAAGGTGTAAGTGGAATGTATTTGGTACCTATGAATTCGTTCT            |
| ATG4B LUC for      | GGGGTACCCTCGCCAGC-CGCGGGTTCGGGC                                |
| ATG4B LUC rev      | CGACGCGTCTTCCAGTCCGGCCGCCGAC                                   |
| ATG12 LUC for      | GGGGTACCCTTGCTTGGAGACACTCGAGAG                                 |
| ATG12 LUC rev      | CGACGCGTGAAAACATTTCTAGGTCCGAGC                                 |
| ATG4B-mut for      | CCGCGTCGCGAAGCTGGCCCGTCG                                       |
| ATG4B-mut rev      | CGACGGGACGCCGCGGGG                                             |
| ATG12-mut1 for     | GCGCACACTCCTTTTAGGCCGCTG                                       |
| ATG12-mut1 rev     | ATTCGACCGAGCACAGAC                                             |
| ATG12-mut2 for     | GTCGAATGCGCTTACTCCAGTTAGG                                      |
| ATG12-mut2 rev     | CGAGCACAGACACGTTGC                                             |
| ATG12-mut3 for     | CGGTGGGCAACTTGTCTGTGCTC                                        |
| ATG12-mut3 rev     | CTCCTCTCCCGAGGTCTG                                             |
| ATG12-mut4 for     | GTTAGTAACGCTTCATGTGTTTCTCCG                                    |
| ATG12-mut4 rev     | GTTCAGAGGTCTGCGACA                                             |

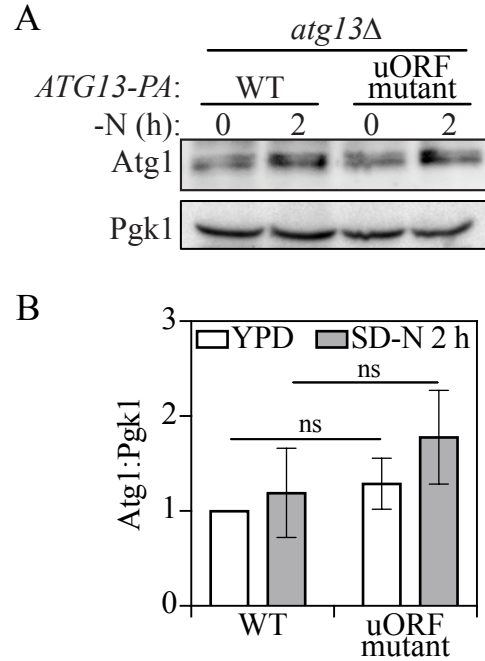

**Figure S1.** Atg1 protein expression levels are not affected by the *ATG13* uORF mutant. **(A)** Atg1 levels were measured by western blot in WT and *ATG13* uORF mutant cells under growing conditions and after 2 h of nitrogen starvation. Pgk1 was used as a loading control. **(B)** The ratio of Atg1 to Pgk1 was quantified. Mean±SD of  $n=3$  independent experiments are shown as indicated. ANOVA; ns: not significant.

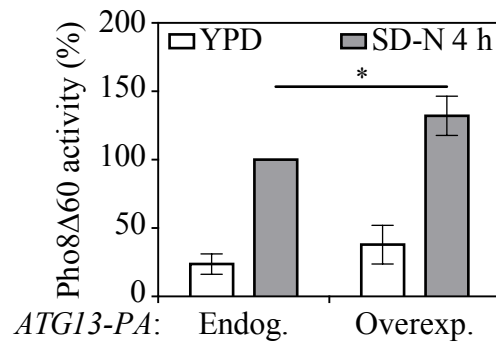

**Figure S2.** Atg13 overexpression results in increased autophagy activity. Autophagy activity was measured using the Pho8Δ60 assay in WT (endogenous Atg13 expression) and Atg13 overexpression strains under growing conditions and after 4 h of nitrogen starvation. Error bars indicate the SD of 3 independent experiments. ANOVA; \*:  $p < 0.05$ .

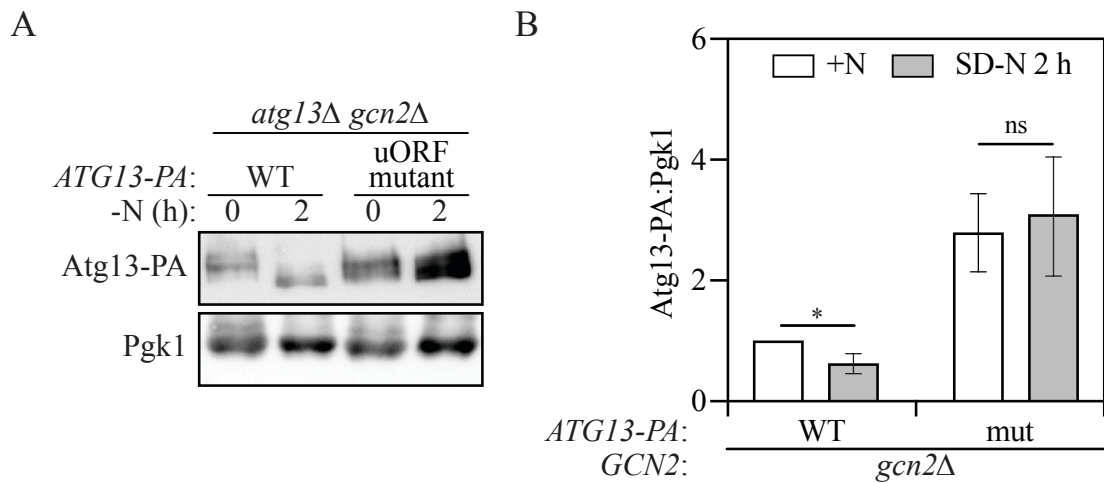

**Figure S3.** Decreased Atg13-PA protein levels under 2-h nitrogen starvation conditions in a *gcn2Δ* strain. **(A)** Atg13-PA protein levels were measured by western blot in *atg13Δ gcn2Δ* cells expressing WT Atg13-PA or an *ATG13* uORF mutant under growing and 2-h nitrogen-starvation conditions; a representative image is shown. **(B)** The ratio of Atg13-PA to Pgk1 was quantified. Mean±SD of  $n=3$  independent experiments are shown as indicated. Student's *t*-test; \*:  $p<0.05$ , ns: not significant.

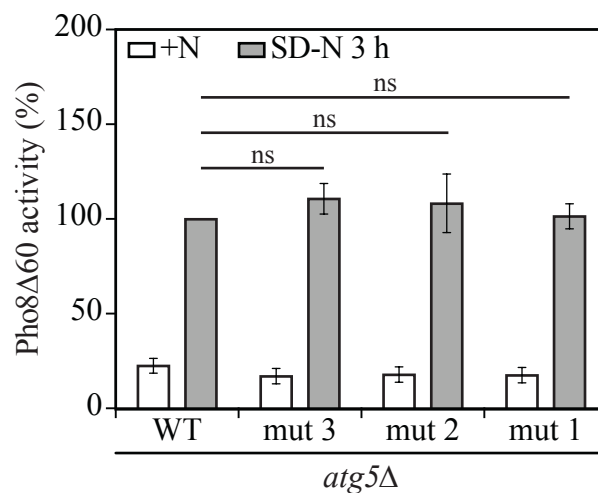

**Figure S4.** Autophagy activity was measured using the Pho8Δ60 assay in WT, and *ATG5* uORF mutant cells under growing conditions and after 3 h of nitrogen starvation. Mean±SD of  $n=3$  independent experiments are shown as indicated. ANOVA; ns: not significant.
